# Identifying interpretable gene-biomarker associations with functionally informed kernel-based tests in 190,000 exomes

Remo Monti<sup>1,2</sup>, Pia Rautenstrauch<sup>2,3</sup>, Mahsa Ghanbari<sup>2</sup>, Alva Rani James<sup>1</sup>, Uwe Ohler<sup>2,3,a</sup>, Stefan Konigorski<sup>1,4,a</sup>, and Christoph Lippert<sup>1,4,a,\*</sup>

<sup>1</sup> *Digital Health - Machine Learning, Hasso Plattner Institute, University of Potsdam, 14482, Potsdam, Germany*

<sup>2</sup> *Berlin Institute for Medical Systems Biology, Max Delbrueck Center for Molecular Medicine, 10115, Berlin, Germany*

<sup>3</sup> *Department of Biology, Humboldt University, 10115, Berlin, Germany*

<sup>4</sup> *Hasso Plattner Institute for Digital Health, Icahn School of Medicine at Mount Sinai, New York 10029-6574, NY, USA*

*\*corresponding author*

*<sup>a</sup>these authors contributed equally*

## Abstract

Here we present an exome-wide rare genetic variant association study for 30 biomarkers in 191,640 individuals in the UK Biobank. We perform gene-based association tests for separate functional variant categories to increase interpretability and identify 201 significant gene-biomarker associations, which include novel associations such as *GIGYF1* with diabetes markers. In addition to performing gene-based variant collapsing tests, we design and apply variant-category-specific kernel-based tests that integrate quantitative functional variant effect predictions for missense variants, splicing and the binding of RNA-binding proteins. For these tests we present a powerful and computationally efficient combination of the likelihood-ratio and score tests that found 32% more associations than the score test alone. Kernel-based tests identified 12-31% more associations than their gene-based collapsing counterparts with large overlaps, and had advantages in the presence of gain of function missense variants. We introduce local collapsing by amino acid position for missense variants and use this approach to identify potential novel gain of function variants in *PIEZO1*, and interpret a position-specific association of *ABCA1*-variants with inflammation marker CRP. Our results show the benefits of separately investigating different functional mechanisms when performing rare-variant association tests, and highlight the strengths of biomarker panels for large biobanks.

## 1 Introduction

Large biobanks that combine in-depth phenotyping with exome sequencing for hundreds of thousands of individuals promise new insights into the genetic architecture of health and disease [1]. Whilst common-variant association studies have detected tens of thousands of loci associated with heritable traits, the underlying functional mechanisms remain largely unknown due to linkage disequilibrium and the fact that the majority of loci lie in non-coding regions of the genome [2]. Furthermore, effect sizes of common variants tend to be small, as

7 variants with large detrimental effects are selected against, which limits their frequency [3, 4].

8 Association studies using whole exome-sequencing (WES) do not face these issues to the same extent, as they  
9 are limited to more interpretable loci where an enrichment for large effect sizes is expected [5]. However, the  
10 majority of genetic variants identified by WES are extremely rare, and the vast number of these variants poses  
11 challenges for rare variant association studies (RVAS), given the burden of multiple testing and low statistical  
12 power due to low allele frequencies [6, 7]. For these reasons, variants in RVAS are typically grouped into sets  
13 that correspond to functional units such as genes prior to association testing [6, 8, 9, 7]. Not only does this  
14 strategy aggregate signal and thereby increase statistical power, but it also lessens the burden of multiple testing.  
15 Burden tests, for example, collapse variants within genes into a single variable prior to association testing, i.e.  
16 perform *gene-based variant collapsing* [6, 10]. Alternatively, *kernel-based tests* aggregate groups of variants into  
17 a so-called kernel matrix that is tested using a score test [8] or the likelihood ratio test (LRT) [9] without the  
18 need for collapsing. Among these, the LRT has higher statistical power but is computationally more expensive  
19 [11].

20 While gene-based variant collapsing performs best in the presence of many causal variants with effect sizes  
21 that point in the same direction (e.g. increasing risk for disease), kernel-based tests have advantages in cases  
22 of opposing effects and fewer causal variants [7]. To increase the fraction of causal variants, exome-wide RVAS  
23 that use variant collapsing have defined qualifying variants based on annotations such as allele frequencies or  
24 variant effect predictions, and excluded all other observed variants from the association tests [6, 12, 13, 14].  
25 These studies have mostly focused on non-synonymous variants, where software tools identify protein truncating  
26 variants and distinguish between benign and potentially deleterious missense variants [15, 16, 17, 18].

27 Here, we perform an extensive RVAS using exome sequencing data from the UK Biobank [19]. For approx-  
28 imately 190,000 individuals, 30 quantitative biomarkers provide objectively quantifiable measures related to  
29 the health status of individuals [20], making them attractive phenotypes for genome-wide association studies  
30 [21]. We go beyond the collapsing tests for coding variants described above and explore the use of kernel-based  
31 association tests and deep-learning-derived effect predictions for gene regulatory variants, namely for splicing  
32 [22] and the binding of RNA-binding proteins (RBPs) [23].

33 Specifically, we use quantitative functional variant effect predictions to group and weigh variants in gene-  
34 based association tests and increase interpretability. The greater flexibility of kernel-based tests allowed us to  
35 design variant-category-specific tests and combine collapsing and non-collapsing approaches in the same test.  
36 For kernel-based tests, we show that a computationally efficient combination of the score test and the LRT  
37 identifies 32% more significant associations on average compared to the score test alone. We find 201 significant  
38 gene-biomarker associations in total, of which 40% have not been previously reported to GWAS databases  
39 [24, 25]. Finally, we interpret associations that were only found for specific variant categories, or associations  
40 for which gene-based variant collapsing and kernel-based tests gave vastly different results.

## 41 2 Results

### 42 2.1 Data description and workflow

43 We performed an RVAS of 30 quantitative serum biomarkers in UK Biobank 200k WES release [19]. These  
44 biomarkers contain established disease risk factors, diagnostic markers, and markers for phenotypes otherwise  
45 not well assessed in the UK Biobank cohort. We roughly categorized these markers into cardiovascular, bone and  
46 joint, liver, renal, hormonal and diabetes markers (Supplementary Table S1). After removing related individuals  
47 and restricting the analysis to those with no missing covariates 192,352 participants remained. 16,737,187 rare  
48 (MAF < 0.1%) variants were observed in this subset and passed basic quality criteria (Methods). The median  
49 sample size for the biomarkers was 182,144 and ranged from 16,022 (Rheumatoid factor) to 183,105 (Alkaline  
50 phosphatase) (Supplementary Table S1). 191,640 participants had at least one measured biomarker.

51 We used functional variant effect predictions to group variants into categories and perform functionally  
52 informed gene-based association tests. Specifically we chose to investigate strict protein loss of function (pLOF,  
53 e.g. frame shift or protein truncating variants) variants, missense variants, splice-altering variants, and variants  
54 predicted to change the binding of RNA-binding proteins (Figure 1, Methods). We treated these categories  
55 separately during association testing to increase interpretability, resulting in multiple tests per gene, which we  
56 refer to as separate *models*. Specifically, we adapted either kernel-based tests, gene-based variant collapsing,  
57 or both types of association test depending on the variant effect category (Methods). We make variant effect  
58 predictions for all variants in the UK Biobank 200k exome release available<sup>1</sup>, as well as our analysis pipeline<sup>2</sup>  
59 and software used to perform association tests<sup>3</sup>.

### 60 2.2 Functionally informed association tests

61 **Protein loss of function** We predicted the effects of genetic variants on protein coding genes using the  
62 Ensembl variant effect predictor [15] and found 475,732 pLOF variants with a median of 20 pLOF variants  
63 per gene (Figure 2, Methods). For pLOF variants, we assumed a large fraction of potentially causal variants,  
64 and that variants within the same gene should by and large affect the phenotype in the same direction. For  
65 these reasons, we performed tests using gene-based variant collapsing tests (Methods), and found 92 significant  
66 associations originating from 53 distinct genes across the genome.

67 **Missense** We defined 1,836,348 high-impact missense variants based on PolyPhen-2 [16] and SIFT [17] (Meth-  
68 ods). 18,420 genes contained at least one high-impact missense variant, with a median of 73 high-impact missense  
69 variants observed per gene.

70 We hypothesized that missense variants in the same gene might have both trait-increasing and trait-  
71 decreasing effects, and that there might be fewer causal variants. For these reasons we performed not only  
72 a gene-based variant collapsing test, but also a kernel-based association test. We designed a missense-specific

<sup>1</sup><https://github.com/HealthML/ukb-200k-wes-vep>

<sup>2</sup><https://github.com/HealthML/faatpipe>

<sup>3</sup><https://github.com/HealthML/seak>

73 kernel that collapses variants locally by amino acid position, which affected 20% of variants (Methods). We  
74 identified 101 significant associations using gene-based variant collapsing, and 128 using kernel-based association  
75 tests, with an overlap of 88. The total of 141 associations identified by either model originated from 78 distinct  
76 genes.

77 **Combining pLOF and missense** As we expected many missense variants to effectively lead to a loss of  
78 function, we combined pLOF and missense variants in additional models. We performed both a joint variant  
79 collapsing test, and a kernel-based test combining gene-based collapsing of pLOF variants and local collapsing of  
80 missense variants (Supplementary Methods). We identified 148 significant associations with gene-based variant  
81 collapsing, and 167 with kernel-based association tests, with an overlap of 125 in 102 genes. Combining missense  
82 variants and protein LOF variants provided 23 unique associations which were not found when testing variants  
83 in either category alone, and which were also not found by other models.

84 **Splicing** We located 775,349 potentially splice-altering rare single nucleotide variants in 17,168 genes by cross  
85 referencing against published SpliceAI variant effect predictions ([22]; Methods). The median number of variants  
86 per gene was 32. We hypothesized that these splice variants could have complex downstream consequences and  
87 decided to compare both gene-based variant collapsing and kernel-based association tests. For kernel-based  
88 tests, we used the weighted linear kernel [8].

89 We identified 38 significant associations with gene-based variant collapsing in 29 distinct genes. As our  
90 definition of pLOF variants included variants that directly hit annotated splice donor/acceptor sites, there was  
91 a considerable overlap of 98,017 variants between these annotations (21% of all pLOF variants). We therefore  
92 expected (and found) large overlaps (32, 84%) in the significant associations for pLOF and splice variants  
93 using gene-based variant collapsing. Kernel-based tests identified 50 significant associations in 35 genes. These  
94 included 32 hits already identified by pLOF gene-based collapsing, but a larger number of hits not identified by  
95 other models.

96 **Combining pLOF and splicing** We expected many predicted splice variants to lead to a loss of function,  
97 and therefore explored joint tests with pLOF variants. We applied both a joint variant collapsing test, and a  
98 kernel-based test that only collapses pLOF variants (Supplementary Methods). Joint gene-based collapsing of  
99 splice variants with pLOF variants identified 78 associations, of which 68 (87%) had already been identified by  
100 our protein LOF analysis. On the other hand, kernel-based association tests identified 94 significant associations  
101 of which 74 (79%) had already been found using pLOF variants. While combining splice and pLOF variants did  
102 yield the lowest p-values across all models for 14 significant associations, it did not uniquely identify additional  
103 associations which hadn't been found by other models already.

104 **RBP-binding** Splicing is only one of several eukaryotic post-transcriptional regulatory mechanisms medi-  
105 ated by interactions of RNA-binding proteins (RBPs) with their target RNAs. As the UK Biobank WES data  
106 also contain variants in non-protein-coding parts of mRNAs, namely in introns (41.4%) and UTRs (5.2%), we

107 reasoned that we may be able to identify variants with effects on gene regulation such as those mediated by dif-  
108 ferential binding of RBPs. Specifically, we investigated if changes in the binding of RBPs predicted by DeepRiPe  
109 [23] could be associated with biomarker levels. The six RBPs QKI, MBNL1, TARDBP, ELAVL1, KHDRBS1  
110 and HNRNPD were selected based on their binding preferences (introns, exons)[26], the high performance of  
111 the model to predict genuine target sites for these RBPs, and the reported presence of clear binding sequence  
112 motifs. We predicted variant effects for these RBPs and identified 395,462 variants with large predicted effects  
113 in 17,459 genes, with a median of 13 variants per gene (Methods).

114 As we expected a low number of causal variants and potentially opposing effect sizes, we only performed  
115 kernel-based association tests and identified 10 significant associations in 9 distinct genes.

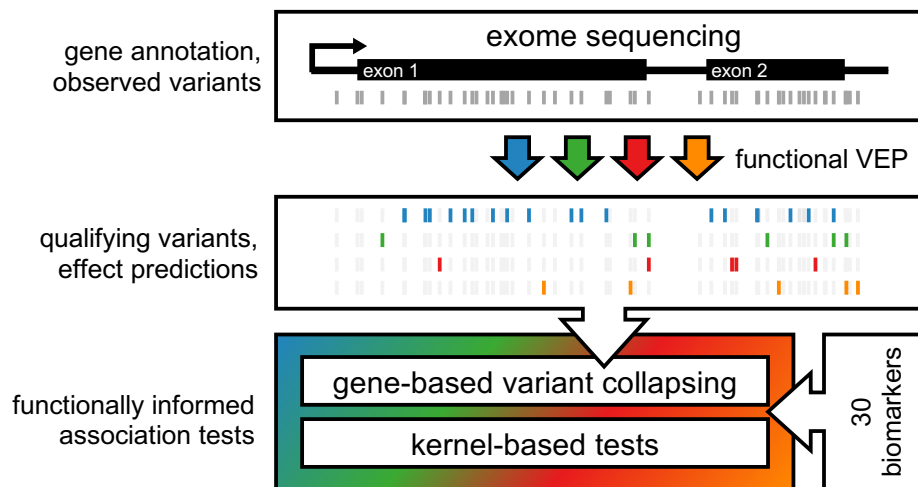

Figure 1: **Rare-variant association testing pipeline.** Exome sequencing measures exon-proximal genetic variants. All variants are subjected to functional variant effect prediction (VEP). Qualifying variants are determined based on the variant effect predictions and minor allele frequencies (MAF<0.1%) and categorized based on their predicted functional impacts (protein loss of function, missense, splicing, RBP-binding). Finally, we test the different categories of qualifying variants in gene-based association tests against 30 biomarkers using gene-based variant collapsing and kernel-based tests.

## 116 2.3 Integrative analysis overview

117 Merging the results from all models yielded a total of 201 gene-biomarker associations originating from 120  
118 distinct genes (Supplementary Table 2). We found at least one significant association for all but three biomark-  
119 ers (urea, oestradiol and rheumatoid factor) (Figure 2, Supplementary Figures S1-S3). For the majority of  
120 associations (119, 60%), combining missense and protein LOF variants produced the smallest p-values. We  
121 calculated the genomic inflation factor  $\lambda$  across all tests that were performed genome-wide, and did not find  
122 evidence of inflated type I error levels (Figure S7, Supplementary Data). Of the 120 distinct loci, 46 (38%) were  
123 associated with more than one biomarker, and a few genes had five or more significant associations: *ANGPTL3*,  
124 *APOB*, *JAK2*, *GIGYF1* and *G6PC*. Many of the genes we found to be associated with specific biomarkers  
125 had either been implicated in diseases related to these biomarkers (e.g. *LRP2* with renal markers [27]) or are  
126 mechanistically related to the biomarkers themselves (e.g. cystatin C with its own gene, *CST*). According to

127 the NHGRI-EBI GWAS Catalog [2, 28] and PhenoScanner ( $p < 10^{-7}$ ) [24, 25] the majority of significant loci  
 128 (60%) contained (primarily common, modest effect-size) variants already reported to be associated with the  
 129 respective biomarkers, as shown for the most significant associations in Table 1.

130 We recovered 136 (83%) of the 163 significant associations reported by [14] for the same phenotypes in  
 131 their gene-based variant collapsing analysis on the UK Biobank 200k WES release (Supplementary Table 3),  
 132 although the sets of participants, preprocessing, covariates, selection criteria for qualifying variants, thresholds  
 133 for genome-wide significance, and statistical tests differed. 4 (4.8%) out of the 83 associations only found  
 134 by our analysis could be explained by the significance cutoff, which was lower in their study ( $5 \times 10^{-9}$ ). Of  
 135 the 79 remaining associations, 19 (24%) could be explained by the use of DeepRiPe- and SpliceAI predictions  
 136 (their collapsing models considered only non-synonymous variants). We further found associations for which  
 137 the kernel-based missense model produced the lowest p-values to be overrepresented in this set (20, 25%, 1.7  
 138 fold). 52 out of 79 (65%) were detectable by the single-variant tests reported in the same study [14] which  
 139 included both rare and common variants.

140 Separating variant effect categories during association testing and comparing kernel-based to gene-based  
 141 collapsing tests allowed us to further interpret our results, as illustrated with several examples below.

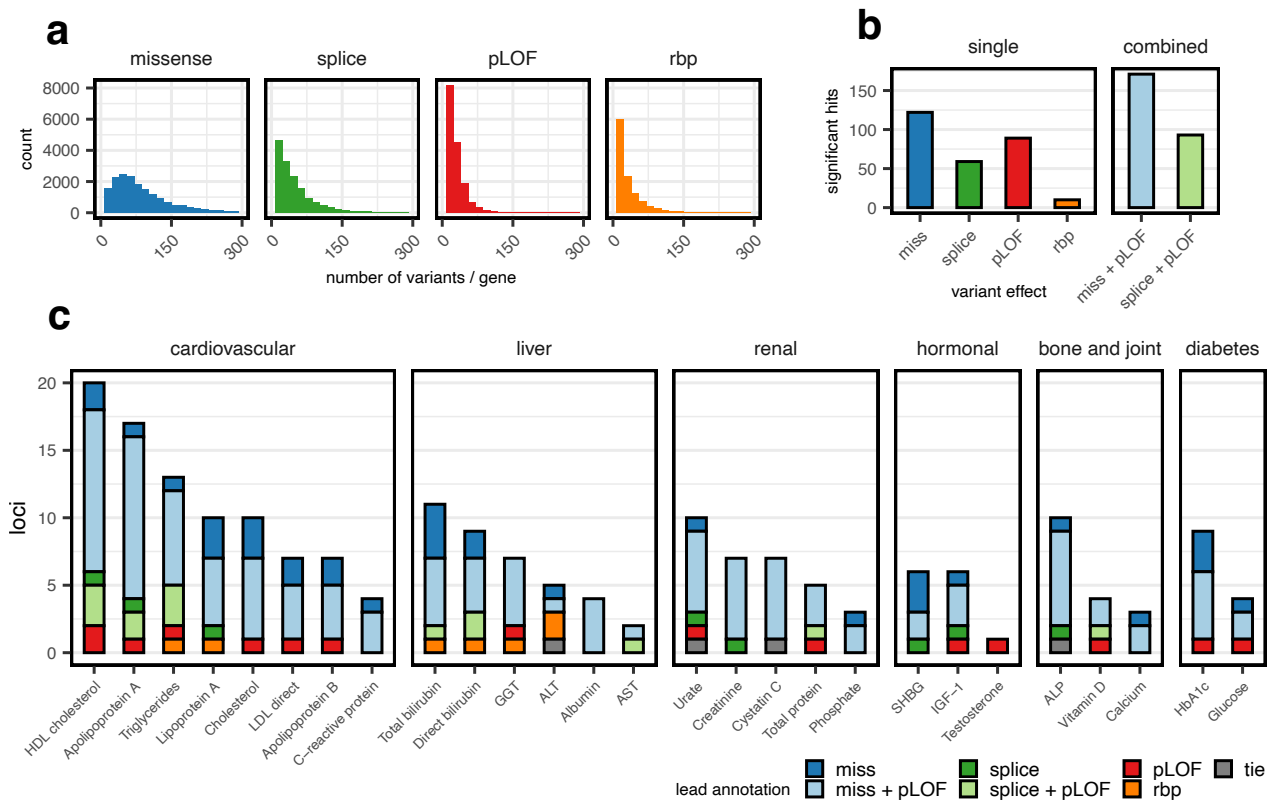

Figure 2: **Association tests overview.** (a) Histograms of the number of qualifying variants per tested gene for the different variant categories. Ranges are truncated at 300 variants, which affected 731 genes for missense, 84 for splice, 7 for pLOF and 15 for rbp (b) Bar plot of the number of significant loci found by testing qualifying variants in the different categories separately (single) or in combination (combined). (c) Bar plot showing 201 significant gene-biomarker associations for 27 biomarkers (x-axis), colored by the variant effect which gave the lowest p-value (lead annotation). ALP: alkaline phosphatase; ALT: alanine aminotransferase; AST: Aspartate aminotransferase; GGT: Gamma glutamyltransferase



| category       | lead gene       | phenotype             | p-value                | variant effect | test | $N_{var}$ | $N_{carrier}$ | prev. reported |
|----------------|-----------------|-----------------------|------------------------|----------------|------|-----------|---------------|----------------|
| bone and joint | <i>GPLD1</i>    | Alkaline phosphatase  | $2.7 \times 10^{-191}$ | miss + pLOF    | gbvc | 222       | 1645          | yes            |
| bone and joint | <i>ASGR1</i>    | Alkaline phosphatase  | $7.1 \times 10^{-106}$ | miss + pLOF    | K    | 97        | 517           | yes            |
| bone and joint | <i>CASR</i>     | Calcium               | $6.3 \times 10^{-50}$  | miss + pLOF    | K    | 140       | 400           | yes            |
| bone and joint | <i>ALB</i>      | Calcium               | $3.6 \times 10^{-28}$  | miss + pLOF    | K    | 117       | 995           | no             |
| bone and joint | <i>APOB</i>     | Vitamin D             | $5 \times 10^{-21}$    | splice + pLOF  | gbvc | 171       | 999           | yes            |
| bone and joint | <i>HSPG2</i>    | Alkaline phosphatase  | $9.5 \times 10^{-21}$  | miss           | K    | 1363      | 12120         | no             |
| cardiovascular | <i>ABCA1</i>    | Apolipoprotein A (+3) | $3.7 \times 10^{-202}$ | miss + pLOF    | K    | 396       | 2184          | yes            |
| cardiovascular | <i>APOB</i>     | LDL direct (+3)       | $3.7 \times 10^{-161}$ | miss + pLOF    | K    | 893       | 5041          | yes            |
| cardiovascular | <i>PCSK9</i>    | LDL direct (+2)       | $3.3 \times 10^{-110}$ | miss + pLOF    | K    | 203       | 1405          | yes            |
| cardiovascular | <i>LCAT</i>     | HDL cholesterol (+1)  | $1.7 \times 10^{-84}$  | miss + pLOF    | gbvc | 107       | 345           | yes            |
| cardiovascular | <i>CETP</i>     | HDL cholesterol (+1)  | $2.2 \times 10^{-84}$  | miss + pLOF    | K    | 101       | 795           | yes            |
| cardiovascular | <i>APOC3</i>    | Triglycerides (+2)    | $7.1 \times 10^{-75}$  | miss + pLOF    | gbvc | 28        | 297           | yes            |
| diabetes       | <i>PIEZO1</i>   | HbA1c                 | $7.3 \times 10^{-150}$ | miss           | K    | 908       | 9087          | yes            |
| diabetes       | <i>GCK</i>      | HbA1c (+1)            | $3 \times 10^{-41}$    | miss + pLOF    | K    | 61        | 175           | yes            |
| diabetes       | <i>RHAG</i>     | HbA1c                 | $1.6 \times 10^{-35}$  | miss + pLOF    | K    | 87        | 793           | no             |
| diabetes       | <i>SPTA1</i>    | HbA1c                 | $1.1 \times 10^{-28}$  | miss + pLOF    | K    | 679       | 5499          | yes            |
| diabetes       | <i>PFKM</i>     | HbA1c                 | $4.4 \times 10^{-23}$  | miss + pLOF    | gbvc | 190       | 947           | yes            |
| diabetes       | <i>JAK2</i>     | HbA1c                 | $7.3 \times 10^{-18}$  | miss           | K    | 223       | 1053          | no             |
| hormonal       | <i>IGFALS</i>   | IGF-1                 | $1.6 \times 10^{-72}$  | miss + pLOF    | gbvc | 252       | 2135          | no             |
| hormonal       | <i>HNF4A</i>    | SHBG                  | $3.3 \times 10^{-25}$  | miss           | K    | 72        | 582           | yes            |
| hormonal       | <i>CLEC10A</i>  | SHBG                  | $6.4 \times 10^{-23}$  | miss           | K    | 39        | 682           | no             |
| hormonal       | <i>IGFBP3</i>   | IGF-1                 | $8 \times 10^{-21}$    | miss           | K    | 51        | 566           | no             |
| hormonal       | <i>DNAH2</i>    | SHBG                  | $4.5 \times 10^{-16}$  | miss           | K    | 875       | 6926          | no             |
| hormonal       | <i>KDM6B</i>    | SHBG                  | $2.7 \times 10^{-12}$  | splice         | K    | 65        | 255           | no             |
| liver          | <i>UGT1A10</i>  | Total bilirubin (+1)  | $8.6 \times 10^{-74}$  | miss + pLOF    | K    | 169       | 2162          | yes            |
| liver          | <i>MROH2A</i>   | Total bilirubin (+1)  | $1.2 \times 10^{-44}$  | miss           | K    | 369       | 3420          | yes            |
| liver          | <i>SLCO1B3</i>  | Direct bilirubin (+1) | $7.5 \times 10^{-31}$  | miss + pLOF    | gbvc | 194       | 1734          | yes            |
| liver          | <i>FCGRT</i>    | Albumin               | $2.5 \times 10^{-30}$  | miss + pLOF    | K    | 90        | 480           | yes            |
| liver          | <i>SLCO1B1</i>  | Total bilirubin (+1)  | $7.9 \times 10^{-28}$  | miss + pLOF    | gbvc | 197       | 1868          | yes            |
| liver          | <i>PLEC</i>     | ALT                   | $3.3 \times 10^{-24}$  | miss           | K    | 1721      | 16444         | no             |
| renal          | <i>SLC22A12</i> | Urate                 | 0                      | miss           | gbvc | 124       | 1109          | yes            |
| renal          | <i>SLC2A9</i>   | Urate                 | $9 \times 10^{-83}$    | miss + pLOF    | K    | 156       | 722           | yes            |
| renal          | <i>ALPL</i>     | Phosphate             | $1.7 \times 10^{-81}$  | miss           | gbvc | 129       | 1071          | .              |
| renal          | <i>FCGRT</i>    | Total protein         | $7.2 \times 10^{-26}$  | miss + pLOF    | K    | 90        | 479           | no             |
| renal          | <i>PDZK1</i>    | Urate                 | $2.9 \times 10^{-22}$  | pLOF           | gbvc | 23        | 180           | yes            |
| renal          | <i>SLC22A2</i>  | Creatinine            | $5.5 \times 10^{-19}$  | miss + pLOF    | gbvc | 171       | 1192          | yes            |

Table 1: **Top hits for every biomarker category.** The six most significant associations for each category are shown, excluding associations of biomarker genes with themselves, and collapsing repeated genes. The number in brackets denotes the number of other biomarkers in the same category the lead gene was also associated with. p-value: smallest p-value over all variant effect categories (column: variant effect) and tests for the lead gene. All p-values shown are derived from the LRT except *PDZK1*-Urate which comes from the score test. test: kernel-based (K) or gene-based variant collapsing (gbvc);  $N_{var}$ : number of variants;  $N_{carrier}$ : number of carriers; prev. reported: whether a GWAS hit for the same biomarker was previously reported within the lead gene (GWAS catalog or PhenoScanner).

## 2.4 GIGYF1 is associated with diabetes markers

Overall, we identified 31 significant associations in 22 loci exclusively in association tests incorporating pLOF variants alone, or pLOF combined with missense or splice variants. For the majority of these associations, combined testing with other variant categories led to smaller p-values. A notable exception were the five significant associations of *GIGYF1* with biomarkers for diabetes [29] and cardiovascular disease risk, which were only significant for gene-based variant collapsing with pLOF variants. Specifically, we found positive associations with glucose ( $p = 3 \times 10^{-9}$ ) and and glycated haemoglobin (HbA1c,  $p = 2 \times 10^{-10}$ ), and negative associations with LDL direct ( $p = 1.6 \times 10^{-9}$ ), Cholesterol ( $p = 6.5 \times 10^{-10}$ ) and Apolipoprotein B ( $p = 3.8 \times 10^{-9}$ ), making it one of the genes with the most associations in the data set. In total we found 69 carriers of *GIGYF1* pLOF variants. Given its role in IGF-1 signalling together with *GRB10* [30, 31], *GIGYF1* pLOF variants could be a plausible albeit rare mechanism for diabetes. At the time of writing, two studies using either the UK Biobank 200k exome sequencing release [32], or a larger tranche of UK Biobank exome sequencing data yet unreleased to the public [33], have confirmed the association of *GIGYF1* with Type II diabetes (T2D). The association with T2D was not reported in in [14], however, associations with HbA1c and Cholesterol also reached genome-wide significance in their analysis (Supplementary Table 3).

## 157 **2.5 Combining variant annotations yields six associations for G6PC**

158 We found six associations for *G6PC*, four of which were only found when combining protein LOF and missense  
159 annotations with gene-based variant collapsing tests (alkaline phosphatase, triglycerides, SHBG, urate). Vari-  
160 ants in *G6PC* cause Glucose-6-phosphatase deficiency type Ia (also called glycogen storage disease Ia) [34, 35],  
161 an autosomal recessive disease categorized by growth retardation, enlarged kidneys and liver, low blood glucose,  
162 and high blood lipid and uric acid levels. Consistent with signs of inflammation and impaired kidney and  
163 liver function, we found elevated levels of alkaline phosphatase ( $p = 8.4 \times 10^{-9}$ ), gamma glutamyltransferase  
164 ( $p = 1.7 \times 10^{-11}$ ), urate ( $p = 2.6 \times 10^{-9}$ ), triglycerides ( $p = 8.9 \times 10^{-9}$ ), and C-reactive protein ( $p = 1.96 \times 10^{-13}$ )  
165 in individuals with predicted high-impact missense or pLOF mutations in *G6PC*. We further identified a sig-  
166 nificant association with decreased levels of sex hormone-binding globulin (SHBG,  $p = 6.1 \times 10^{-10}$ ), which is  
167 primarily produced in the liver [36]. All p-values above are those given by gene-based variant collapsing tests  
168 combining missense and pLOF variants, the model that gave the lowest p-values for all these associations. While  
169 Glucose-6-phosphatase deficiency type Ia is a rare recessive disease, our findings show that altered biomarker  
170 levels indicative of mild symptoms are detectable in heterozygous carriers of missense and LOF variants in the  
171 *G6PC* gene.

## 172 **2.6 Novel potential gain of function variants in PIEZO1**

173 Our testing strategy allowed us to identify genes in which specific variant categories might play an important  
174 role. One such example was *PIEZO1*, a mechanosensitive cation channel [37], which we found associated with  
175 diabetes marker HbA1c.

176 For gene-based variant collapsing tests, we found a significant negative association of missense variants with  
177 HbA1c ( $p = 2.8 \times 10^{-39}$ ), while the test for pLOF variants was not significant ( $p = 0.862$ , 623 carriers). By far  
178 the lowest p-value for this gene was given by the kernel-based test for missense variants ( $p = 7.296 \times 10^{-150}$ ).  
179 Combining pLOF variants and missense variants did not lead to smaller p-values, but was still highly significant  
180 ( $p = 3.5 \times 10^{-148}$ , kernel-based LRT). The large differences between variant categories and type of association  
181 tests lead us to closer investigate the 908 predicted high-impact missense variants in 9,352 individuals for this  
182 gene.

183 We performed single-variant score tests and identified multiple missense variants with strong negative as-  
184 sociations with HbA1c (Table 2). One these variants, 16:88719665:G:A or T2127M (rs587776991) is a gain  
185 of function variant that slows down inactivation kinetics of *PIEZO1* in patients with dehydrated hereditary  
186 stomatocytosis (a disorder of red blood cells), together with other gain of function variants [38, 39]. Decreased  
187 levels of HbA1c had previously been observed in individuals with red blood cell disorders [40, 41, 42].

188 We therefore hypothesised that the other highly significant variants could also potentially be gain of function  
189 variants. We grouped the missense variants within *PIEZO1* by the amino acid positions they affected and  
190 performed local variant collapsing. This allowed us to identify other positions in *PIEZO1* (e.g. 2110R or  
191 2474V) that are potentially sensitive to gain of function mutations (Table 2, Figure 3).



192 Consistent with a role of red blood cell disorders, we also found associations of *RHAG* (Rh Associated  
193 Glycoprotein) and *SPTA1* with decreased levels of HbA1c. Mutations in *RHAG* cause overhydrated hereditary  
194 stomatocytosis [43], while *SPTA1* mutations cause hereditary elliptocytosis [44].

195 While it has been suggested that *PIEZO1* stimulates insulin release [45], the decreased levels of HbA1c  
196 we observed in individuals with *PIEZO1*-variants are more likely explained by (perhaps subclinical) forms of  
197 stomatocytosis or other abnormalities in red blood cells resulting from increased membrane permeability, i.e. a  
198 gain of function [46].

| variant id      | position | weight | variant | $N_{carrier}$ | variant p-val.        | $\beta_{variant}$ | $\pm$ | position p-value      | $\beta_{position}$ | $\pm$ |
|-----------------|----------|--------|---------|---------------|-----------------------|-------------------|-------|-----------------------|--------------------|-------|
| 16:88736318:C:T | 463      | 0.983  | A/T     | 109           | $1.9 \times 10^{-10}$ | -0.5591           | 0.088 | $2.5 \times 10^{-10}$ | -0.56              | 0.088 |
| 16:88736317:G:A | 463      | 0.998  | A/V     | 1             | 0.92                  | 0.0938            | 0.92  | $2.5 \times 10^{-10}$ | -0.56              | 0.088 |
| 16:88731880:C:G | 1008     | 0.99   | G/R     | 65            | $7.9 \times 10^{-14}$ | -0.8494           | 0.11  | $5 \times 10^{-15}$   | -0.87              | 0.11  |
| 16:88731880:C:T | 1008     | 0.99   | G/R     | 3             | 0.013                 | -1.3151           | 0.53  | $5 \times 10^{-15}$   | -0.87              | 0.11  |
| 16:88726891:A:C | 1175     | 0.998  | F/V     | 4             | $4.5 \times 10^{-8}$  | -2.5068           | 0.46  | $4.5 \times 10^{-8}$  | -2.5               | 0.46  |
| 16:88726565:C:T | 1260     | 0.706  | V/I     | 78            | $6.2 \times 10^{-8}$  | -0.5619           | 0.1   | $2 \times 10^{-8}$    | -0.69              | 0.12  |
| 16:88726565:C:A | 1260     | 1      | V/F     | 1             | 0.062                 | -1.7112           | 0.92  | $2 \times 10^{-8}$    | -0.69              | 0.12  |
| 16:88721626:C:G | 1772     | 0.988  | R/P     | 13            | $4.5 \times 10^{-6}$  | -1.1661           | 0.25  | $2.4 \times 10^{-9}$  | -1.1               | 0.18  |
| 16:88721627:G:C | 1772     | 0.976  | R/G     | 10            | 0.0008                | -0.9712           | 0.29  | $2.4 \times 10^{-9}$  | -1.1               | 0.18  |
| 16:88721626:C:A | 1772     | 0.982  | R/L     | 1             | 0.042                 | -1.8650           | 0.92  | $2.4 \times 10^{-9}$  | -1.1               | 0.18  |
| 16:88721627:G:A | 1772     | 0.998  | R/C     | 1             | 0.5                   | -0.6168           | 0.92  | $2.4 \times 10^{-9}$  | -1.1               | 0.18  |
| 16:88721423:C:G | 1804     | 0.867  | G/A     | 31            | $8.1 \times 10^{-11}$ | -1.0700           | 0.16  | $8.1 \times 10^{-11}$ | -1.1               | 0.18  |
| 16:88719717:G:A | 2110     | 0.998  | R/W     | 9             | $5.5 \times 10^{-18}$ | -2.6395           | 0.31  | $6 \times 10^{-33}$   | -2.7               | 0.22  |
| 16:88719716:C:T | 2110     | 0.894  | R/Q     | 9             | $1.4 \times 10^{-16}$ | -2.5241           | 0.31  | $6 \times 10^{-33}$   | -2.7               | 0.22  |
| 16:88719665:G:A | 2127     | 1      | T/M     | 22            | $1 \times 10^{-31}$   | -2.2895           | 0.2   | $1 \times 10^{-31}$   | -2.3               | 0.2   |
| 16:88716656:G:T | 2277     | 0.956  | L/M     | 314           | $2.9 \times 10^{-39}$ | -0.6885           | 0.052 | $2.9 \times 10^{-39}$ | -0.7               | 0.054 |
| 16:88716649:C:T | 2279     | 0.829  | R/H     | 16            | $9.8 \times 10^{-9}$  | -1.3146           | 0.23  | $3.5 \times 10^{-9}$  | -0.99              | 0.17  |
| 16:88716650:G:A | 2279     | 0.976  | R/C     | 16            | 0.0063                | -0.6260           | 0.23  | $3.5 \times 10^{-9}$  | -0.99              | 0.17  |
| 16:88716649:C:G | 2279     | 0.763  | R/P     | 1             | 0.58                  | -0.5004           | 0.92  | $3.5 \times 10^{-9}$  | -0.99              | 0.17  |
| 16:88716234:C:T | 2365     | 0.812  | G/R     | 9             | $3.3 \times 10^{-16}$ | -2.4926           | 0.31  | $3.3 \times 10^{-16}$ | -2.8               | 0.34  |
| 16:88715751:C:T | 2474     | 0.987  | V/M     | 101           | $4.7 \times 10^{-8}$  | -0.4983           | 0.091 | $1.2 \times 10^{-8}$  | -0.52              | 0.091 |
| 16:88715751:C:G | 2474     | 0.879  | V/L     | 2             | 0.029                 | -1.4117           | 0.65  | $1.2 \times 10^{-8}$  | -0.52              | 0.091 |
| 16:88715751:C:A | 2474     | 0.879  | V/L     | 1             | 0.82                  | -0.2111           | 0.92  | $1.2 \times 10^{-8}$  | -0.52              | 0.091 |

Table 2: **Potential *PIEZO1* gain of function variants** Variants are grouped and ordered by the amino acid position and single-variant p-values. All variants with position p-values below  $10^{-7}$  are shown. weight: impact score;  $N_{carrier}$ : number of carriers; variant p-val.: single-variant p-value (score test);  $\beta_{variant}$ : variant effect size ( $\pm$  standard error); position p-value: p-value when collapsing variants by position (score test);  $\beta_{position}$ : position effect size ( $\pm$  standard error). Positions relate to the ENST00000301015 transcript

## 199 2.7 Position-specific association of *ABCA1* variants with inflammation marker 200 CRP

201 We found four significant associations of *ABCA1* with biomarker levels. Three of these, namely the associations  
202 with Apolipoprotein A, HDL cholesterol, and cholesterol, are directly related to its role as an ATP-dependent  
203 transporter of cholesterol [47]. In line with previous findings, in our gene-based variant collapsing analysis we  
204 found both pLOF and high-impact missense variants to be strongly associated with decreased serum levels of  
205 these biomarkers [48].

206 Yet, one additional association with inflammation marker C-reactive protein (CRP) was only identified by the  
207 kernel-based association test ( $p = 3.997 \times 10^{-27}$ ). This prompted us to further investigate the 344 high-impact  
208 missense variants observed in *ABCA1*. Single-variant score tests and collapsing by amino-acid position identified  
209 two missense variants (9:104831048:C:A, 9:104831048:C:G) in one of the extracellular domains affecting the same  
210 amino acid (W590) which were associated with strongly decreased levels of CRP (Figure 3). The two variants

211 carried most of the signal in this gene with single-variant p-values of  $2.08 \times 10^{-31}$  for W590L (A allele, 54  
212 carriers) and  $8.41 \times 10^{-8}$  for W590S (G allele, 12 carriers, score test).

213 The W590S-variant leads to reduced cholesterol and phospholipid efflux, while retaining expression and  
214 ability to bind APOA1[49, 50]. The other and more common variant, W590L, has been observed [51, 52], but  
215 to our knowledge not experimentally evaluated.

216 The binding of APOA1 to ABCA1 activates anti-inflammatory pathways via JAK2 and STAT3 in macrophages  
217 [53]. Because W590S has been shown to slow dissociation of bound APOA1[50], this provides a plausible causal  
218 mechanism for the reduced levels of CRP we observe in carriers of the W590S-variant. We hypothesize that  
219 W590L might act through the same mechanism. This property could set these variants apart from other missense  
220 variants in *ABCA1*, which have been reported to abolish binding of APOA1[49].

221 *ABCA1* could therefore be a gene in which some variants elicit both a gain of function (slower dissociation  
222 of APOA1) and a loss of function (decreased cholesterol efflux) with distinct effects on different biomarkers.

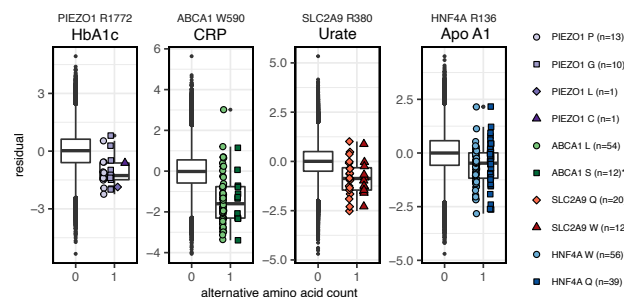

Figure 3: **Local collapsing of missense variants.** Dosage box plots showing the alternative amino acid counts (x-axis) against the covariate-adjusted quantile transformed phenotypes (y-axis). Collapsing variants by amino acid position identified negative associations of *PIEZO1* R1772 with HbA1c ( $p = 2.36 \times 10^{-9}$ ), *ABCA1* W590 with C-reactive protein ( $p = 1.13 \times 10^{-37}$ ), *SLC2A9* R380 with Urate ( $p = 6 \times 10^{-10}$ ) and *HNF4A* R136 with Apolipoprotein A ( $p = 1.3 \times 10^{-10}$ , score test). Collapsing together with ClinVar variants with reported conditions (\*) helps place novel variants into disease context. For all 4 associations, collapsed p-values were lower than those of the single variants.

## 223 2.8 A pathogenic *JAK2* gain of function variant is associated with multiple biomark- 224 ers

225 We found seven significant associations of variants in *JAK2* with biomarker levels, making it the gene with  
226 the highest number of significant associations. While its negative association with IGF-1 was only significant  
227 for protein LOF variants, six additional associations were found exclusively with kernel-based association tests  
228 incorporating missense variants. Upon closer investigation, we found a single missense variant (9:5073770:G:T)  
229 which was largely responsible for the significant associations with biomarkers for lipid metabolism (Apolipoprotein  
230 A, HDL cholesterol, cholesterol, LDL direct; all negative), kidney function (Cystatin C; positive) and  
231 diabetes (HbA1c; negative). This variant, also known as V617F or rs77375493 leads to constitutive phospho-  
232 rylation activity and is a known prognostic marker in myeloproliferative neoplasms [54, 55]. *JAK2* is therefore  
233 an example of a gene in which we observe a single gain of function variant with potential effects on multiple  
234 biomarkers.

## 2.9 Unique associations identified by splice-predictions

In total, we identified 7 associations exclusively when incorporating SpliceAI variant effect predictions of which 6 were only found using kernel-based association tests. Specifically, we found associations of variants in *SLC9A5* with Apolipoprotein A and HDL cholesterol, *NDUFB8* with Aspartate aminotransferase, *ATL3* with Urate, *GHI* with IGF-1, *ECE1* with with Alkaline phosphatase, and *KDM6B* with SHBG.

Most of these associations were mainly caused by single variants. An exception was the known association of *GHI* (Growth Hormone 1) with IGF-1 [56], the only hit in this subset also found by gene-based variant collapsing. The interpretation of single highly significant variants driving associations could not necessarily be narrowed down to a single mechanism. For example, the predicted splice variant in the last exon responsible for the two significant associations of *SLC9A5* (16:67270978:G:A, 29 carriers, Figure 4a), was also a missense variant (with low to moderate predicted impact [52]). *ECE1* and *KDM6B* lie in proximity to the genes coding for the biomarkers they were found associated with (*ALPL*, *SHBG*), therefore we couldn't exclude transcriptional cis-regulatory effects as the cause of these associations.

## 2.10 Associations identified by RBP-binding predictions

Out of the 10 significant associations we identified using DeepRiPe variant effect predictions, the associations of *ANGPTL3* with Triglycerides, and *AGPAT4*, *PLG* and *LPA* with Lipoprotein A had also been found using other models. The extreme heritability of Lipoprotein A, which is largely due to variation in the *LPA* gene [57, 58], makes it hard to interpret the associations for the lead genes *LPA*, *AGPAT4* and *PLG*, that all lie within a megabase distance to *LPA*. The association we observed for *ANGPTL3* was largely driven by a single intronic variant (1:62598067:T:C, Figure 4), which was predicted to increase the binding probability of QKI. The same variant on the opposite strand was also responsible for the association of *DOCK7* with triglycerides. However, we determined that *ANGPTL3* was more likely the causal gene, given the associations of *ANGPTL3* with triglycerides we had independently found with other variant categories and the close proximity of an *ANGPTL3* exon.

We further investigated this variant by assessing binding probabilities of RBPs beyond the six RBPs in focus here that are represented in DeepRiPe. We found that the variant was also predicted to decrease the binding probability of BCLAF1, a factor related to mRNA processing [59] and increase binding of HNRNPL (Figure 4). Using attribution maps [23], we found that instead of strengthening or inserting a new QKI binding motif, this variant weakens a splice donor signal in the presence of upstream binding motifs for the splicing regulators QKI and HNRNPL (Supplementary Figure S4). SpliceAI predicted only a weak upstream donor loss (0.02) for this variant, which was well below the threshold of 0.1 we used to identify splice-altering variants, but indicative of the same trend.

The remaining five associations exclusively identified by association tests incorporating RBP-binding predictions were those of *ATG16L1* with Total bilirubin and direct bilirubin, *UPB1* with Gamma glutamyltransferase, *SLC39A4* with Alanine aminotransferase and *SHARPIN* with Alanine aminotransferase.

270 Both *SHARPIN* and *SLC39A4* lie within half a megabase of the Alanine aminotranferase gene (*GPT*), there-  
271 fore we could not exclude potential transcriptional cis-regulatory effects as the true cause for these associations.  
272 Furthermore, single variants carried most of the signal for both genes.

273 Common intronic variants of *ATG16L1* were previously found to be associated with Crohn's disease and  
274 inflammatory bowel disease [60, 61] and increased bilirubin levels [62, 63]. To our knowledge, rare variants  
275 with associations to bilirubin levels within *AT16L1*, especially those potentially affecting RBP-binding, have  
276 not been identified by previous studies.

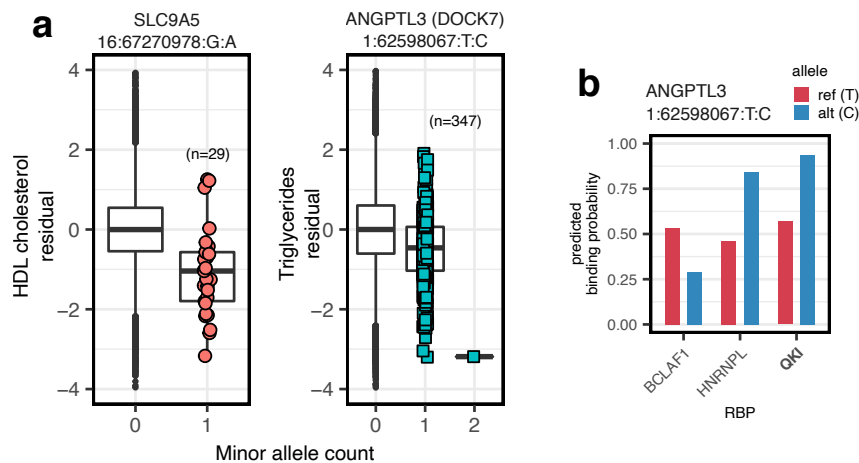

Figure 4: **Variants identified by deep learning** (a) Dosage box plots showing covariate-adjusted quantile transformed phenotypes against minor allele counts for variants in *SLC9A5* and *ANGPTL3/DOCK7*. A predicted splice-variant 16:67270978:G:A is negatively associated with HDL cholesterol ( $p = 8.36 \times 10^{-12}$ , score test), whereas intronic 1:62598067:T:C is negatively associated with Triglycerides ( $p = 1.25 \times 10^{-25}$ , score test). (b) DeepRiPe binding probabilities for 1:62598067:T:C for three RBPs in HepG2 cells. While predicted probabilities for the reference sequence are ambiguous, the alternative allele shifts binding probabilities in favor of QKI and HNRNPL. All RBPs with absolute predicted variant effects above 0.2 and binding probabilities greater than 0.5 for either reference or alternative alleles are shown.

## 277 2.11 Combined likelihood ratio and score tests (sLRT)

278 In order to benefit from both the speed of the score tes [8] and higher power of the LRT [11] we investigated  
279 the use of a combination of these tests, which we call the sLRT (score-LRT). The sLRT is a likelihood ratio test  
280 that is performed only when initial score tests reach nominal significance at a given cutoff  $t$ . If this threshold is  
281 not reached, it returns the score test p-value. Throughout our analysis, we used  $t = 0.1$ , and found that it was  
282 unlikely that a larger threshold would have identified many more associations (Supplementary Figure S5). As  
283 the run time is dominated by the cost of computing the LRT, this test can achieve a computational speedup  
284 factor of roughly  $1/t = 10$  over the LRT under the null hypothesis.

285 The sLRT identified more significant associations than the score test particularly when performing kernel-  
286 based association tests (Supplementary Figure S6). For missense and splice variants, the kernel-based sLRT  
287 captured all associations that would have been identified by the kernel-based score test alone. In both cases,  
288 the sLRT identified additional associations. However, a large fraction of these additional associations (40% for  
289 splice variants, and 61% for missense variants) were also identified by gene-based variant collapsing for which

290 the sLRT and score test gave almost identical results. Nevertheless, we found the majority of the remaining  
291 additional associations to be plausible and/or previously reported in other association studies and therefore  
292 used the sLRT throughout our analysis, except for pLOF variants, where we only performed only a gene-based  
293 variant collapsing test.

### 294 **3 Discussion**

295 In our analysis, we combined gene-based variant collapsing and kernel-based tests under a common framework  
296 and performed functionally informed gene-based tests for rare variants with 30 biomarkers.

297 Overall, our approach was successful at identifying disease genes without explicitly using disease diagnoses  
298 themselves, even for recessive diseases (*G6PC*, glycogen storage disease Ia [34]), or diseases with mixed inheri-  
299 tance patterns (*LRP2*, Fanconi syndrom [27]), while keeping the number of tests low compared to phenome-wide  
300 association studies.

301 While some of the changes in biomarker levels we detected might be sub-clinical, they could interfere with  
302 the diagnosis of common conditions which rely on biomarkers. To prevent misdiagnoses and enable preventative  
303 care, our results could aid the design of targeted sequencing panels that focus on the genes with the highest  
304 impacts. For example, we found 8% of participants to harbor at least one protein LOF variant in any of the  
305 significant loci for that variant category. In other words, it's fairly common to have at least one uncommon  
306 LOF variant with potential effects on biomarker levels.

307 One major contribution of our study was the design and successful application of kernel-based tests that  
308 incorporate quantitative functional variant effect predictions for large exome sequencing data. A previous  
309 study had tried to apply kernel-based score tests using SKAT [8] on the 50k WES release, but found mostly  
310 unreliable results [12]. In contrast to their approach we did not re-weigh variants according to allele frequencies.  
311 Furthermore, we showed that a computationally efficient combination of the LRT and score test has potentially  
312 higher power than the score test alone, and identified more associations than gene-based variant collapsing.

313 When comparing gene-based collapsing and kernel-based tests for missense variants, we found kernel-based  
314 tests to have advantages in the presence of gain of function variants (*PIEZO1*, *ABCA1*, *JAK2*), where they  
315 identified plausible causal associations missed by gene-based collapsing tests. These genes likely are examples  
316 of a low fraction of causal variants, a regime in which kernel-based tests are statistically more powerful than  
317 gene-based collapsing [7].

318 Although kernel-based tests should also provide benefits if genes contain variants with strong opposing  
319 effect sizes, we did not find this to be a widespread phenomenon for the associations we identified (with some  
320 exceptions such as *APOB*). More such cases could appear for non-coding regions in whole-genome sequencing  
321 studies.

322 While we found a large overlap between our associations and those found in the variant collapsing analysis  
323 presented in [14], the differences highlight the sensitivity of gene-based tests to qualifying criteria for rare  
324 variants, which can make them harder to reproduce. By making our analysis pipeline public, we hope to

325 increase reproducibility and enable others to explore different qualifying criteria more easily. By performing  
326 kernel-based tests and including variants potentially acting through splicing and the binding of RBPs, we  
327 identified additional associations without the need for single-variant tests.

328 We demonstrated how local collapsing of missense variants by amino acid position aids interpretation and  
329 causal reasoning in the presence of previously validated variants. Local collapsing was directly built into the  
330 kernel-based tests we performed for missense variants, where it affected 20% of variants, a number which will  
331 further grow with larger and datasets.

332 We explored the use of deep-learning-derived variant effect predictions for splicing and the binding of RBPs.  
333 The restriction to exon-proximal regions meant we only observed a fraction of the variants potentially acting  
334 through these mechanisms. Associations found by incorporating splice-predictions largely overlapped with those  
335 identified with pLOF variants (which included simple splice donor/acceptor variants). While we found some  
336 associations exclusively with splice-predictions, these were mostly due to single variants and would need further  
337 validation (e.g. *SLC9A5*). Similar reasoning holds for the associations found with predictions for RBP-binding.  
338 We anticipate that deep-learning-based predictions will become more valuable for non-coding regions in whole-  
339 genome sequencing studies, for which the approaches we developed will also be applicable.

340 Deep-learning-derived functional annotations have been considered in other studies in the context of asso-  
341 ciation testing. Proposed methods include signed LD-score regression [64], or the association tests presented in  
342 DeepWAS [65]. However, these methods have not been designed for rare variants. Other statistical methods  
343 that combine multiple functional annotations could potentially further reduce the number of tests [66].

344 In future studies, methods like AlphaFold [67] could allow specific testing of effects on protein folding.  
345 Methods that allow predicting residue-residue interactions within proteins could enable the mostly unsupervised  
346 identification of protein domains and their separate testing [68].

347 The methodological advances and practices we applied in this association study also apply to those situations,  
348 and serve as potential baselines for functionally informed kernel-based association tests with rare variants.

## 349 4 Methods

### 350 4.1 UK Biobank Data processing

351 All 30 blood biochemistry biomarkers (category 17518) from the UK Biobank were quantile-transformed to  
352 match a normal distribution with mean 0 and unit standard deviation using scikit-learn (v0.22.2) [69]. For  
353 testosterone, which showed a clear bimodal distribution based on sex, quantile transformation was performed  
354 separately for both sexes. Sex, BMI, age at recruitment, smoking status and the first 10 genetic principal  
355 components were used as covariates (Supplementary Table S1). Smoking status (never, previous, current)  
356 was encoded in three separate binary variables. Participants with any missing covariates were excluded. We  
357 used the `ukb_gen_samples_to_remove` function of the `ukbtools` package (v0.11.3) [70] together with pre-computed  
358 relatedness scores (`ukbA_rel.sP.txt`, see UK Biobank Resource 531) to remove closely related individuals, keeping



359 only one representative of groups that are related to the 3rd degree or less. After removing 6,293 related  
360 individuals and restricting to those with no missing covariates, 192,352 participants remained. This sample  
361 was 55% female (45% male) and the average age at recruitment was 56.46 years ( $\sigma = 8.08$ ). Furthermore, the  
362 average BMI was 27.37 ( $\sigma = 4.77$ ) and our subset contained 18,562 current and 67,109 previous smokers.

363 In our analysis we made use of the PLINK-formatted exome sequencing genotype data. The final results  
364 presented in this manuscript were derived from the 200k WES release produced by the OQFE pipeline [19].  
365 The UK Biobank pipeline already implements quality filters [19, 71]. Additionally, we removed all variants that  
366 violated the Hardy-Weinberg equilibrium (HWE) assumption (HWE exact test p-value below the threshold  
367 of  $10^{-5}$ ) and variants genotyped in less than 90% of participants. Furthermore, we calculated minor allele  
368 frequencies within all unrelated participants with complete covariates (see above), and excluded variants with  
369 minor allele frequencies above 0.1% from the rare-variant association tests. We did not analyze variants on sex  
370 chromosomes. 16,737,187 variants passed these filters, of which 43.64% were singletons. We directly use UK  
371 Biobank variant identifiers (which include chromosome and 1-based hg38 positions) to name variants in order  
372 to facilitate comparisons.

## 373 4.2 Variant effect prediction and annotation

374 **Protein loss of function and missense** We predicted effects for all genetic variants that passed basic fil-  
375 tering using the Ensembl Variant Effect Predictor [15] (VEP, v101; cache version 97), including scores from  
376 Polyphen-2 [16] (v2.2.2) and SIFT [17] (v5.2.2). All variants marked as splice\_acceptor\_variant, splice\_donor\_variant,  
377 frameshift\_variant, stop\_gained, stop\_lost or start\_lost were considered protein loss of function (pLOF) variants  
378 as in [12]. We further annotated missense variants by calculating impact scores (averages between deleterious-  
379 probabilities given by PolyPhen-2 and SIFT), which were used to filter and weigh variants in the association  
380 tests. Specifically, Missense variants were included if their impact score was at least 0.8, or if they affected  
381 amino acid positions for which another variant with impact score of at least 0.8 was observed.

382 **Splicing** We retrieved published pre-computed variant effect predictions produced by the SpliceAI deep learn-  
383 ing model [22] for single nucleotide variants. SpliceAI predicts consequences of genetic variants for nearby splice  
384 sites, specifically splice donor loss/gain or splice acceptor loss/gain. We used the splice-site-proximal masked  
385 delta scores (v1.3). In the masked files, scores corresponding to the strengthening of annotated splice sites  
386 and weakening of non-annotated splice sites are set to 0, as these are generally less pathogenic. We included  
387 splice-variants in the association tests if at least one of the four SpliceAI delta scores was greater or equal to  
388 0.1. The maxima over the different delta scores for every variant were used to weigh variants in the association  
389 tests (Supplementary Methods).

390 **RBP-binding** We predicted the effects of all genetic variants on the binding of 6 RNA-binding proteins  
391 (RBPs) using a modified version of the DeepRiPe deep neural network [23], in which predictions are purely  
392 sequence-based. We predicted the differences in binding by subtracting the predictions for the reference alleles

393 from those for the alternative allele [72], and used these variant effect predictions to filter and weigh variants  
394 during the association tests (Supplementary Methods). Variants were included into the association tests if at  
395 least one predicted effect on any of the RBPs had an absolute value greater or equal to 0.25.

### 396 4.3 Statistical models and tests

397 Let  $N(\boldsymbol{\mu}; \boldsymbol{\Sigma})$  denote a multivariate Normal distribution with means  $\boldsymbol{\mu}$  and a variance-covariance matrix  $\boldsymbol{\Sigma}$ .  
398 We wish to jointly test the association of  $m$  genetic variants with a quantitative trait  $\mathbf{y}$  for a sample of  $N$   
399 observations (i.e. participants), while controlling for  $q$  covariates. Within the linear mixed model framework,  $\mathbf{y}$   
400 can be modelled as follows [8, 9]:

$$\mathbf{y} \sim N(\mathbf{X}\boldsymbol{\alpha}; \sigma_e^2 \mathbf{I}_N + \sigma_g^2 \mathbf{K}_g), \quad (1)$$

401 where  $\mathbf{X}$  is the  $N \times q$  covariate design matrix (fixed effect) and  $\boldsymbol{\alpha}$  is the vector of fixed-effect parameters,  
402 which together determine the mean values of  $\mathbf{y}$ . The variance-covariance matrix of  $\mathbf{y}$  is composed of the  
403 independently distributed residual variance ( $\mathbf{I}_N$  scaled by  $\sigma_e^2$ ) and the kernel-matrix  $\mathbf{K}_g$  (scaled by  $\sigma_g^2$ ), which  
404 captures the genetic similarity between individuals.  $\mathbf{K}_g$  is a function of the  $N \times m$  matrix of mean-centered  
405 minor allele counts  $\mathbf{G}$  (random effect) of the genetic variants we wish to test.

406 Any valid variance-covariance matrix can be substituted for  $\mathbf{K}_g$ . In order to use efficient algorithms for  
407 estimating the parameters  $\sigma_e^2$  and  $\sigma_g^2$  and performing association tests, we require  $\mathbf{K}_g$  to be factored as a  
408 quadratic form [9, 11]:

$$\mathbf{K}_g = \phi(\mathbf{G})\phi(\mathbf{G})^T, \quad (2)$$

409 where the function  $\phi$  transforms  $\mathbf{G}$  into intermediate variables before performing the test. Finding an  
410 appropriate function  $\phi$  depends on the underlying biological assumptions, and the available prior information.  
411 Gene-based variant collapsing approaches are a special case, in which the function  $\phi$  returns an  $N \times 1$  vector (a  
412 single variable) as output. Therefore kernel-based tests and variant collapsing methods can be treated under the  
413 same statistical framework. In our analysis,  $\phi$  is a function that transforms  $\mathbf{G}$  taking variant effect predictions  
414 and, for missense and RBP-variants, variant positions into account (Supplementary Methods).

415 Regardless of the choice of kernel (and hence  $\phi$ ) the statistical test is defined by the null hypothesis  $H_0 :$   
416  $\sigma_g^2 = 0$ , and the alternative hypothesis  $H_1 : \sigma_g^2 \geq 0$ . Both a score test and likelihood ratio test (LRT) have been  
417 described for this application. While the score test is often chosen in statistical genetics applications due to  
418 its speed and software availability, the LRT has been shown to have higher power but is computationally more  
419 demanding [8, 11, 73].

420 In order to avoid computing the LRT for all genes but still profit from potentially higher power, we performed  
421 score tests genome-wide and only performed the LRT if score tests (within the specific variant category) reached  
422 nominal significance, an approach which we call the score-LRT (sLRT, Supplementary Methods). The sLRT

423 returns the p-value for the score test if nominal significance was not reached, otherwise it returns the p-value  
424 for the likelihood ratio test.

425 We applied the statistical framework above to perform both gene-based variant collapsing tests and kernel-  
426 based association tests, corresponding to different functions  $\phi$  (Supplementary Methods). We adjust p-values  
427 for the total number of tests performed using Bonferroni correction ( $\text{FWER} = 0.05$ ), which lead to a cutoff of  
428  $1.4435 \times 10^{-8}$ .

#### 429 **4.4 Gene-based testing procedure**

430 We performed gene-based tests for all protein coding genes in the Ensembl 97 release. For all pLOF variants  
431 we performed gene-based variant collapsing using the score test genome-wide.

432 For missense variants, we performed both gene-based variant collapsing and kernel-based association tests  
433 using the sLRT. For the kernel-based tests with missense variants, we designed a kernel that collapses variants  
434 by amino acid position (local collapsing), and weighs them by their impact score. Additionally, in cases where  
435 either missense-variant score test used in the sLRT was nominally significant ( $p < 0.1$ ), we combined missense  
436 and protein LOF variants for joint tests. For these joint tests, we investigated both the use of joint gene-  
437 based collapsing test and a kernel-based test that combines collapsing of pLOF variants with local collapsing of  
438 missense variants by concatenation (Supplementary Methods).

439 For predicted splice-variants we followed a similar strategy as for missense variants, however, we used the  
440 weighted linear kernel [8] without local collapsing instead. Finally, in the association tests including variants  
441 predicted to change the binding of RBPs, we only performed kernel-based association tests using the sLRT. For  
442 this purpose we designed a kernel that can take into account both variant positions and directionality of variant  
443 effects (Supplementary Methods).

444 Because some of the genes in the Ensembl 97 release share exons, we encountered cases in which these genes  
445 shared associations caused by the same variants. We do not report these as distinct gene-biomaker associations  
446 in the main text (except when comparing to [14], who reported all such associations), but include the full list  
447 in Supplementary Table 2.

#### 448 **4.5 Data availability**

449 Variant effect predictions for all variants in the 200k exome sequencing release are made available on github  
450 (<https://github.com/HealthML/ukb-200k-wes-vep>).

#### 451 **4.6 Code availability**

452 Code that allows reproducing results from this study is available on github (<https://github.com/HealthML/faatpipe>).

## 453 4.7 Contributions

454 R.M., S.K. and C.L. conceived and designed the study. R.M., P.R., A.R. and S.K. performed initial prototyping.  
455 R.M. and P.R. wrote software to perform the statistical tests with guidance from U.O., S.K. and C.L.. R.M.  
456 wrote the analysis pipeline with guidance from A.R., S.K., U.O. and C.L.. R.M. carried out the statistical  
457 analyses with guidance from S.K., U.O. and C.L.. M.G. supplied the weights for the DeepRiPe model and  
458 produced attribution maps. P.R. and R.M. queried GWAS databases. R.M., P.R, S.K. and C.L. wrote the  
459 manuscript. All authors revised the manuscript.

## 460 Acknowledgements

461 The authors wish to thank Wolfgang Kopp for valuable comments on the manuscript. This research has  
462 been conducted using the UK Biobank Resource under Application Number 40502. This research has received  
463 funding by the German Federal Ministry of Education and Research (BMBF) in the project KI-LAB-ITSE  
464 (project number 01—S19066) and the European Commission in the Horizon 2020 project INTERVENE (Grant  
465 agreement ID: 101016775).

## 466 References

- 467 [1] Sudlow, C. *et al.* Uk biobank: an open access resource for identifying the causes of a wide range of complex  
468 diseases of middle and old age. *Plos med* **12**, e1001779 (2015).
- 469 [2] Buniello, A. *et al.* The nhgri-ebi gwas catalog of published genome-wide association studies, targeted arrays  
470 and summary statistics 2019. *Nucleic acids research* **47**, D1005–D1012 (2019).
- 471 [3] Manolio, T. A. *et al.* Finding the missing heritability of complex diseases. *Nature* **461**, 747–753 (2009).
- 472 [4] Hernandez, R. D. *et al.* Ultrarare variants drive substantial cis heritability of human gene expression.  
473 *Nature genetics* **51**, 1349–1355 (2019).
- 474 [5] Zhu, Q. *et al.* A genome-wide comparison of the functional properties of rare and common genetic variants  
475 in humans. *The American Journal of Human Genetics* **88**, 458–468 (2011).
- 476 [6] Li, B. & Leal, S. M. Methods for detecting associations with rare variants for common diseases: application  
477 to analysis of sequence data. *The American Journal of Human Genetics* **83**, 311–321 (2008).
- 478 [7] Lee, S., Abecasis, G. R., Boehnke, M. & Lin, X. Rare-variant association analysis: study designs and  
479 statistical tests. *The American Journal of Human Genetics* **95**, 5–23 (2014).
- 480 [8] Wu, M. C. *et al.* Rare-variant association testing for sequencing data with the sequence kernel association  
481 test. *The American Journal of Human Genetics* **89**, 82–93 (2011).

- 482 [9] Listgarten, J. *et al.* A powerful and efficient set test for genetic markers that handles confounders. *Bioinformatics* **29**, 1526–1533 (2013).  
483
- 484 [10] Povysil, G. *et al.* Rare-variant collapsing analyses for complex traits: guidelines and applications. *Nature Reviews Genetics* **20**, 747–759 (2019).  
485
- 486 [11] Lippert, C. *et al.* Greater power and computational efficiency for kernel-based association testing of sets  
487 of genetic variants. *Bioinformatics* **30**, 3206–3214 (2014).
- 488 [12] Cirulli, E. T. *et al.* Genome-wide rare variant analysis for thousands of phenotypes in over 70,000 exomes  
489 from two cohorts. *Nature Communications* **11**, 542 (2020).
- 490 [13] Van Hout, C. V. *et al.* Exome sequencing and characterization of 49,960 individuals in the uk biobank.  
491 *Nature* **586**, 749–756 (2020).
- 492 [14] Wang, Q. *et al.* Surveying the contribution of rare variants to the genetic architecture of human disease  
493 through exome sequencing of 177,882 uk biobank participants. *bioRxiv* (2020).
- 494 [15] McLaren, W. *et al.* The ensembl variant effect predictor. *Genome biology* **17**, 1–14 (2016).
- 495 [16] Adzhubei, I., Jordan, D. M. & Sunyaev, S. R. Predicting functional effect of human missense mutations  
496 using polyphen-2. *Current protocols in human genetics* **76**, 7–20 (2013).
- 497 [17] Ng, P. C. & Henikoff, S. Sift: Predicting amino acid changes that affect protein function. *Nucleic acids  
498 research* **31**, 3812–3814 (2003).
- 499 [18] Sundaram, L. *et al.* Predicting the clinical impact of human mutation with deep neural networks. *Nature  
500 genetics* **50**, 1161–1170 (2018).
- 501 [19] Szustakowski, J. D. *et al.* Advancing human genetics research and drug discovery through exome sequencing  
502 of the uk biobank. *medRxiv* (2020).
- 503 [20] Strimbu, K. & Tavel, J. A. What are biomarkers? *Current Opinion in HIV and AIDS* **5**, 463 (2010).
- 504 [21] Sinnott-Armstrong, N. *et al.* Genetics of 35 blood and urine biomarkers in the uk biobank. *Nature genetics*  
505 1–10 (2021).
- 506 [22] Jaganathan, K. *et al.* Predicting splicing from primary sequence with deep learning. *Cell* **176**, 535–548  
507 (2019).
- 508 [23] Ghanbari, M. & Ohler, U. Deep neural networks for interpreting rna-binding protein target preferences.  
509 *Genome research* **30**, 214–226 (2020).
- 510 [24] Staley, J. R. *et al.* Phenoscanner: a database of human genotype–phenotype associations. *Bioinformatics*  
511 **32**, 3207–3209 (2016).

- 512 [25] Kamat, M. A. *et al.* Phenoscanner v2: an expanded tool for searching human genotype–phenotype associ-  
513 ations. *Bioinformatics* **35**, 4851–4853 (2019).
- 514 [26] Mukherjee, N. *et al.* Deciphering human ribonucleoprotein regulatory networks. *Nucleic acids research* **47**,  
515 570–581 (2019).
- 516 [27] Willnow, T. E. & Christ, A. Endocytic receptor lrp2/megalin—of holoprosencephaly and renal fanconi  
517 syndrome. *Pflügers Archiv-European Journal of Physiology* **469**, 907–916 (2017).
- 518 [28] Magno, R. & Maia, A.-T. gwasrapid: an r package to query, download and wrangle gwas catalog data.  
519 *Bioinformatics* **36**, 649–650 (2020).
- 520 [29] Rohlfing, C. L. *et al.* Defining the relationship between plasma glucose and hba1c: analysis of glucose  
521 profiles and hba1c in the diabetes control and complications trial. *Diabetes care* **25**, 275–278 (2002).
- 522 [30] Giovannone, B. *et al.* Two novel proteins that are linked to insulin-like growth factor (igf-i) receptors by  
523 the grb10 adapter and modulate igf-i signaling. *Journal of Biological Chemistry* **278**, 31564–31573 (2003).
- 524 [31] Wang, L. *et al.* Peripheral disruption of the grb10 gene enhances insulin signaling and sensitivity in vivo.  
525 *Molecular and cellular biology* **27**, 6497–6505 (2007).
- 526 [32] Curtis, D. Weighted burden analysis in 200,000 exome-sequenced subjects characterises rare variant effects  
527 on risk of type 2 diabetes. *medRxiv* (2021).
- 528 [33] Deaton, A. M. *et al.* Gene-level analysis of rare variants in 363,977 whole exome sequences reveals an  
529 association of gifyf1 loss of function with diabetes. *medRxiv* (2021).
- 530 [34] Chou, J. Y. & Mansfield, B. C. Mutations in the glucose-6-phosphatase- $\alpha$  (g6pc) gene that cause type ia  
531 glycogen storage disease. *Human mutation* **29**, 921–930 (2008).
- 532 [35] Froissart, R. *et al.* Glucose-6-phosphatase deficiency. *Orphanet journal of rare diseases* **6**, 1–12 (2011).
- 533 [36] Nakhla, A. M. *et al.* Human sex hormone-binding globulin gene expression-multiple promoters and complex  
534 alternative splicing. *BMC Molecular Biology* **10**, 1–18 (2009).
- 535 [37] Coste, B. *et al.* Piezo1 and piezo2 are essential components of distinct mechanically activated cation  
536 channels. *Science* **330**, 55–60 (2010).
- 537 [38] Albuissou, J. *et al.* Dehydrated hereditary stomatocytosis linked to gain-of-function mutations in mechan-  
538 ically activated piezo1 ion channels. *Nature communications* **4**, 1–9 (2013).
- 539 [39] Andolfo, I. *et al.* Multiple clinical forms of dehydrated hereditary stomatocytosis arise from mutations in  
540 piezo1. *Blood* **121**, 3925–3935 (2013).
- 541 [40] Song, A. *et al.* Low hba1c with normal hemoglobin in a diabetes patient caused by piezo1 gene variant: A  
542 case report. *Frontiers in Endocrinology* **11**, 356 (2020).



- 543 [41] Nakatani, R. *et al.* Importance of the average glucose level and estimated glycosylated hemoglobin in a diabetic  
544 patient with hereditary hemolytic anemia and liver cirrhosis. *Internal Medicine* **57**, 537–543 (2018).
- 545 [42] Finan, E. & Joseph, J. Glycosylated haemoglobin: a false sense of security. *BMJ Case Reports CP* **11**,  
546 e227668 (2018).
- 547 [43] Bruce, L. J. *et al.* The monovalent cation leak in overhydrated stomatocytic red blood cells results from  
548 amino acid substitutions in the rh-associated glycoprotein. *Blood* **113**, 1350–1357 (2009).
- 549 [44] Sahr, K. *et al.* Sequence and exon-intron organization of the dna encoding the alpha i domain of human  
550 spectrin. application to the study of mutations causing hereditary elliptocytosis. *The Journal of clinical*  
551 *investigation* **84**, 1243–1252 (1989).
- 552 [45] Deivasikamani, V. *et al.* Piezo1 channel activation mimics high glucose as a stimulator of insulin release.  
553 *Scientific reports* **9**, 1–10 (2019).
- 554 [46] Andolfo, I., Russo, R., Gambale, A. & Iolascon, A. Hereditary stomatocytosis: an underdiagnosed condi-  
555 tion. *American journal of hematology* **93**, 107–121 (2018).
- 556 [47] Tang, C.-K. *et al.* Effect of apolipoprotein ai on atp binding cassette transporter a1 degradation and  
557 cholesterol efflux in thp-1 macrophage-derived foam cells. *Acta biochimica et biophysica Sinica* **36**, 218–  
558 226 (2004).
- 559 [48] Marcil, M. *et al.* Mutations in the abc 1 gene in familial hdl deficiency with defective cholesterol efflux.  
560 *The Lancet* **354**, 1341–1346 (1999).
- 561 [49] Vaughan, A. M., Tang, C. & Oram, J. F. Abca1 mutants reveal an interdependency between lipid export  
562 function, apoa-i binding activity, and janus kinase 2 activation. *Journal of lipid research* **50**, 285–292  
563 (2009).
- 564 [50] Nagao, K., Zhao, Y., Takahashi, K., Kimura, Y. & Ueda, K. Sodium taurocholate-dependent lipid efflux  
565 by abca1: effects of w590s mutation on lipid translocation and apolipoprotein ai dissociation. *Journal of*  
566 *lipid research* **50**, 1165–1172 (2009).
- 567 [51] Probst, M. C. *Development and evaluation of multiplex and high-throughput SNP analysis for the ABCA1*  
568 *gene*. Ph.D. thesis (2004).
- 569 [52] Karczewski, K. J. *et al.* The mutational constraint spectrum quantified from variation in 141,456 humans.  
570 *Nature* **581**, 434–443 (2020).
- 571 [53] Tang, C., Liu, Y., Kessler, P. S., Vaughan, A. M. & Oram, J. F. The macrophage cholesterol exporter abca1  
572 functions as an anti-inflammatory receptor. *Journal of Biological Chemistry* **284**, 32336–32343 (2009).
- 573 [54] James, C. *et al.* A unique clonal jak2 mutation leading to constitutive signalling causes polycythaemia  
574 vera. *nature* **434**, 1144–1148 (2005).

- 575 [55] Rumi, E. *et al.* Clinical effect of driver mutations of jak2, calr, or mpl in primary myelofibrosis. *Blood,*  
576 *The Journal of the American Society of Hematology* **124**, 1062–1069 (2014).
- 577 [56] Goddard, A. D. *et al.* Mutations of the growth hormone receptor in children with idiopathic short stature.  
578 *New England Journal of Medicine* **333**, 1093–1098 (1995).
- 579 [57] Enkhmaa, B., Anuurad, E., Zhang, W., Tran, T. & Berglund, L. Lipoprotein (a): genotype–phenotype  
580 relationship and impact on atherogenic risk. *Metabolic syndrome and related disorders* **9**, 411–418 (2011).
- 581 [58] Shadrina, A. S. *et al.* Prioritization of causal genes for coronary artery disease based on cumulative evidence  
582 from experimental and in silico studies. *Scientific reports* **10**, 1–15 (2020).
- 583 [59] Sarras, H., Alizadeh Azami, S. & McPherson, J. P. In search of a function for bclaf1. *TheScientificWorld-*  
584 *Journal* **10**, 1450–1461 (2010).
- 585 [60] Jostins, L. *et al.* Host–microbe interactions have shaped the genetic architecture of inflammatory bowel  
586 disease. *Nature* **491**, 119–124 (2012).
- 587 [61] Liu, J. Z. *et al.* Association analyses identify 38 susceptibility loci for inflammatory bowel disease and  
588 highlight shared genetic risk across populations. *Nature genetics* **47**, 979–986 (2015).
- 589 [62] Choi, Y. *et al.* Causal associations between serum bilirubin levels and decreased stroke risk: a two-sample  
590 mendelian randomization study. *Arteriosclerosis, thrombosis, and vascular biology* **40**, 437–445 (2020).
- 591 [63] Seo, J. Y. *et al.* A genome-wide association study on liver enzymes in korean population. *Plos one* **15**,  
592 e0229374 (2020).
- 593 [64] Reshef, Y. A. *et al.* Detecting genome-wide directional effects of transcription factor binding on polygenic  
594 disease risk. *Nature genetics* **50**, 1483–1493 (2018).
- 595 [65] Arloth, J. *et al.* Deepwas: Multivariate genotype-phenotype associations by directly integrating regulatory  
596 information using deep learning. *PLoS computational biology* **16**, e1007616 (2020).
- 597 [66] Li, X. *et al.* Dynamic incorporation of multiple in silico functional annotations empowers rare variant  
598 association analysis of large whole-genome sequencing studies at scale. *Nature genetics* **52**, 969–983 (2020).
- 599 [67] Senior, A. W. *et al.* Improved protein structure prediction using potentials from deep learning. *Nature*  
600 **577**, 706–710 (2020).
- 601 [68] Rives, A. *et al.* Biological structure and function emerge from scaling unsupervised learning to 250 million  
602 protein sequences. *Proceedings of the National Academy of Sciences* **118** (2021).
- 603 [69] Pedregosa, F. *et al.* Scikit-learn: Machine learning in python. *the Journal of machine Learning research*  
604 **12**, 2825–2830 (2011).

- 605 [70] Hanscombe, K. B., Coleman, J. R., Traylor, M. & Lewis, C. M. ukbtools: An r package to manage and  
606 query uk biobank data. *PLoS One* **14**, e0214311 (2019).
- 607 [71] Van Hout, C. V. *et al.* Exome sequencing and characterization of 49,960 individuals in the UK Biobank.  
608 *Nature* **586**, 749–756 (2020).
- 609 [72] Zhou, J. & Troyanskaya, O. G. Predicting effects of noncoding variants with deep learning–based sequence  
610 model. *Nature methods* **12**, 931–934 (2015).
- 611 [73] Zhou, W. *et al.* Scalable generalized linear mixed model for region-based association tests in large biobanks  
612 and cohorts. *Nature genetics* **52**, 634–639 (2020).
- 613 [74] Davies, R. B. The distribution of a linear combination of  $\chi^2$  random variables. *Journal of the Royal*  
614 *Statistical Society: Series C (Applied Statistics)* **29**, 323–333 (1980).
- 615 [75] Kuonen, D. Miscellanea. saddlepoint approximations for distributions of quadratic forms in normal vari-  
616 ables. *Biometrika* **86**, 929–935 (1999).
- 617 [76] Lippert, C. *et al.* Fast linear mixed models for genome-wide association studies. *Nature methods* **8**, 833–835  
618 (2011).
- 619 [77] Scheipl, F., Greven, S. & Kuechenhoff, H. Size and power of tests for a zero random effect variance or  
620 polynomial regression in additive and linear mixed models. *Computational statistics & data analysis* **52**,  
621 3283–3299 (2008).
- 622 [78] Lee, S., Wu, M. C. & Lin, X. Optimal tests for rare variant effects in sequencing association studies.  
623 *Biostatistics* **13**, 762–775 (2012).

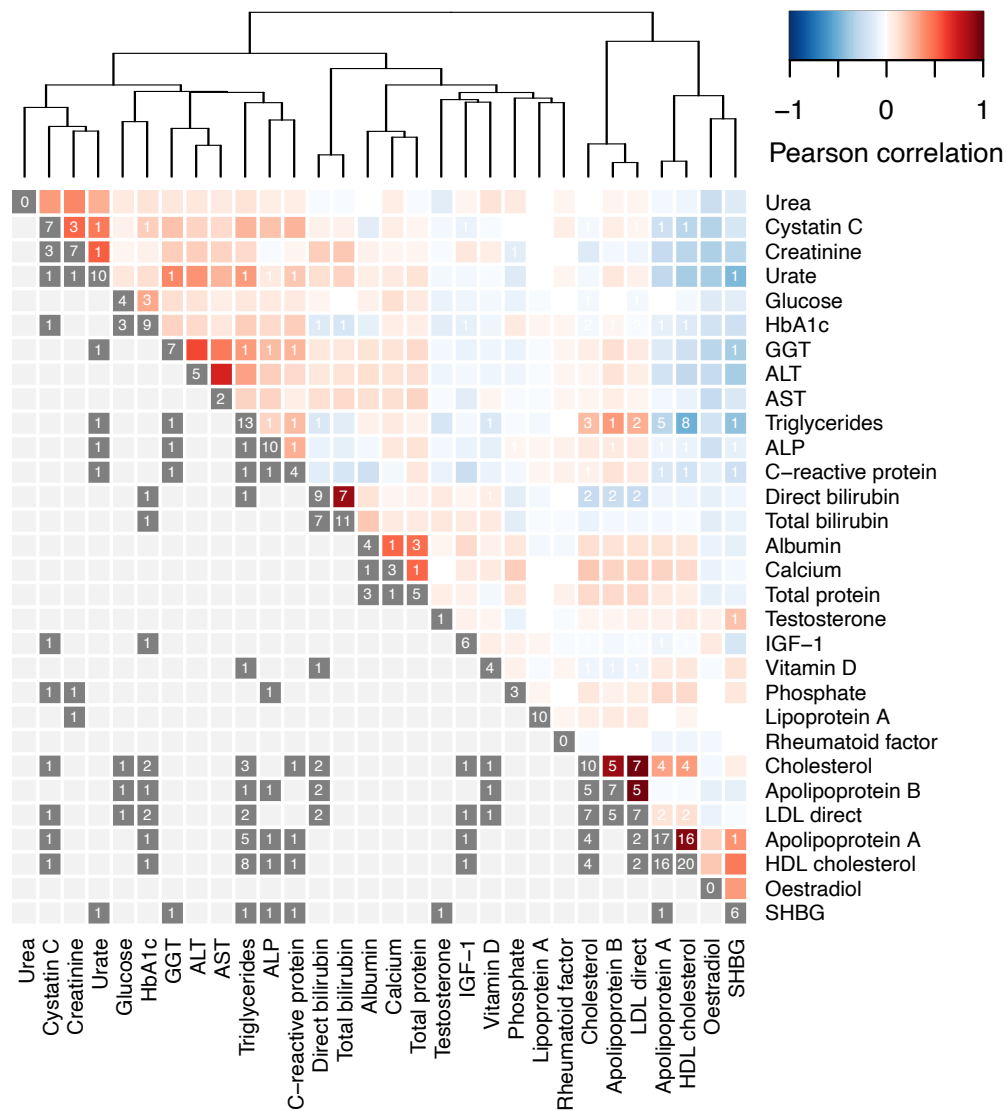

Supplementary Figure S1: **Biomarker correlation and number of hits.** Heatmap showing Pearson correlation between pre-processed biomarkers (upper triangle) and number of significant associations (cell notes). Rows and columns are clustered using complete linkage on the Euclidean distances of the correlation matrix between phenotypes (dendrogram). While some even weakly (anti-)correlated biomarkers share significant associations (e.g. Cholesterol and Glucose, gene: *GIGYF1*), other highly correlated markers do not share significant associations (e.g. GGT, ALT, AST). ALP: alkaline phosphatase; ALT: alanine aminotransferase; AST: Aspartate aminotransferase; GGT: Gamma glutamyltransferase.

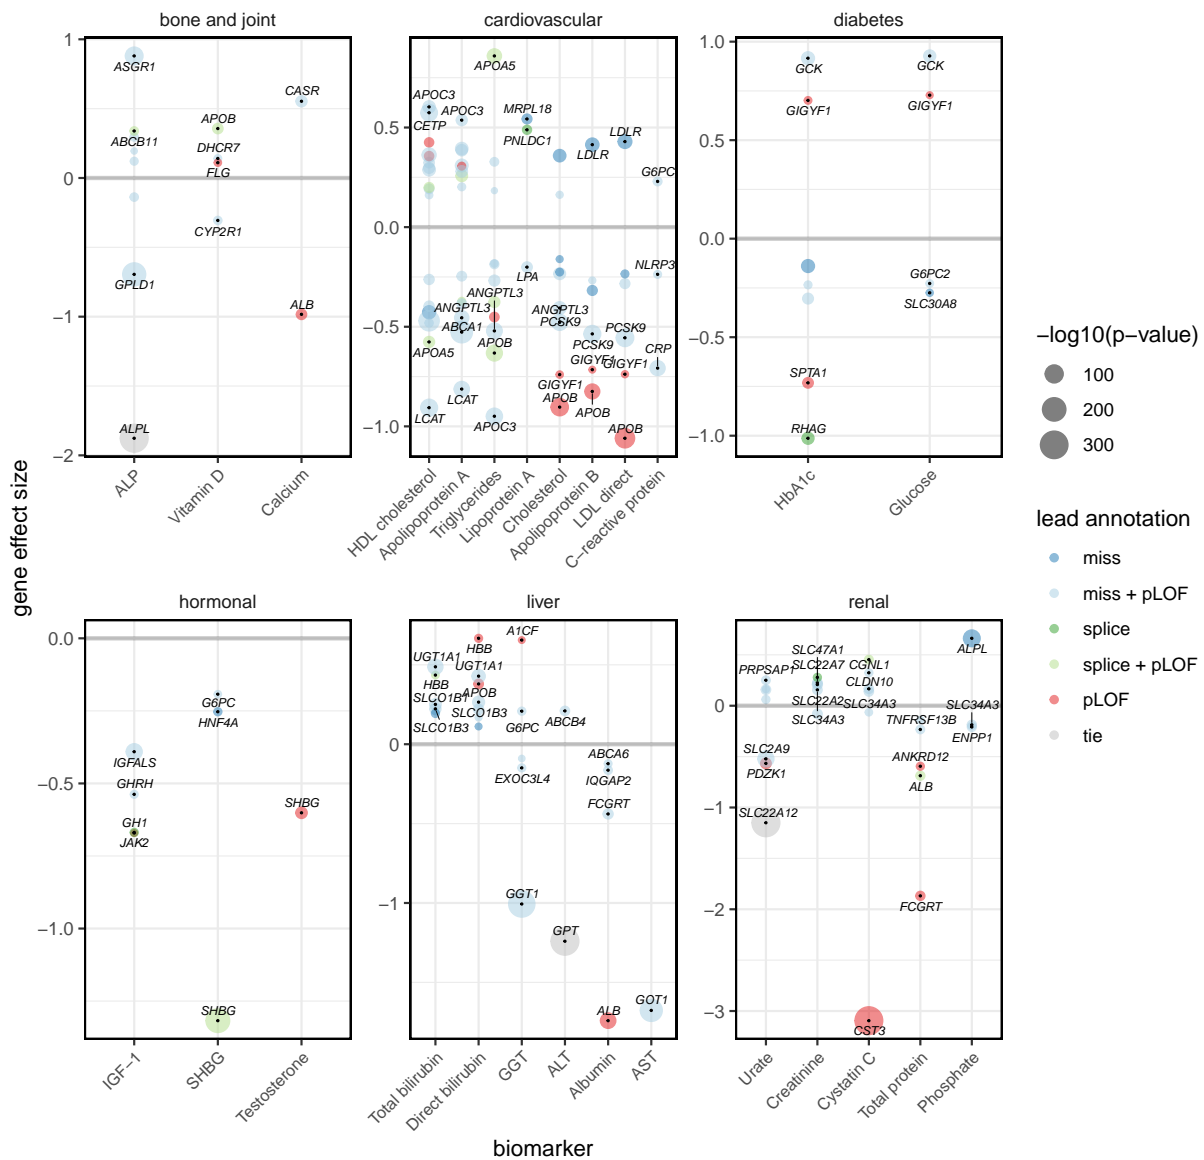

Supplementary Figure S2: **Gene-based variant collapsing results overview.** Collapsing variants allows defining gene effect sizes. Bubble plots showing the gene effect sizes (y-axis) of significant associations for each biomarker (x-axis). The four genes with largest absolute effect sizes are labeled for each biomarker. Larger bubble size indicates higher significance. P-values and effect sizes are those given by the most significant variant effect category (lead annotation). In case of ties ( $p = 0$ , gray) the average effect size across annotations is shown. Effect sizes are calculated on covariate-corrected quantile transformed phenotypes. ALP: alkaline phosphatase; ALT: alanine aminotransferase; AST: Aspartate aminotransferase; GGT: Gamma glutamyltransferase.

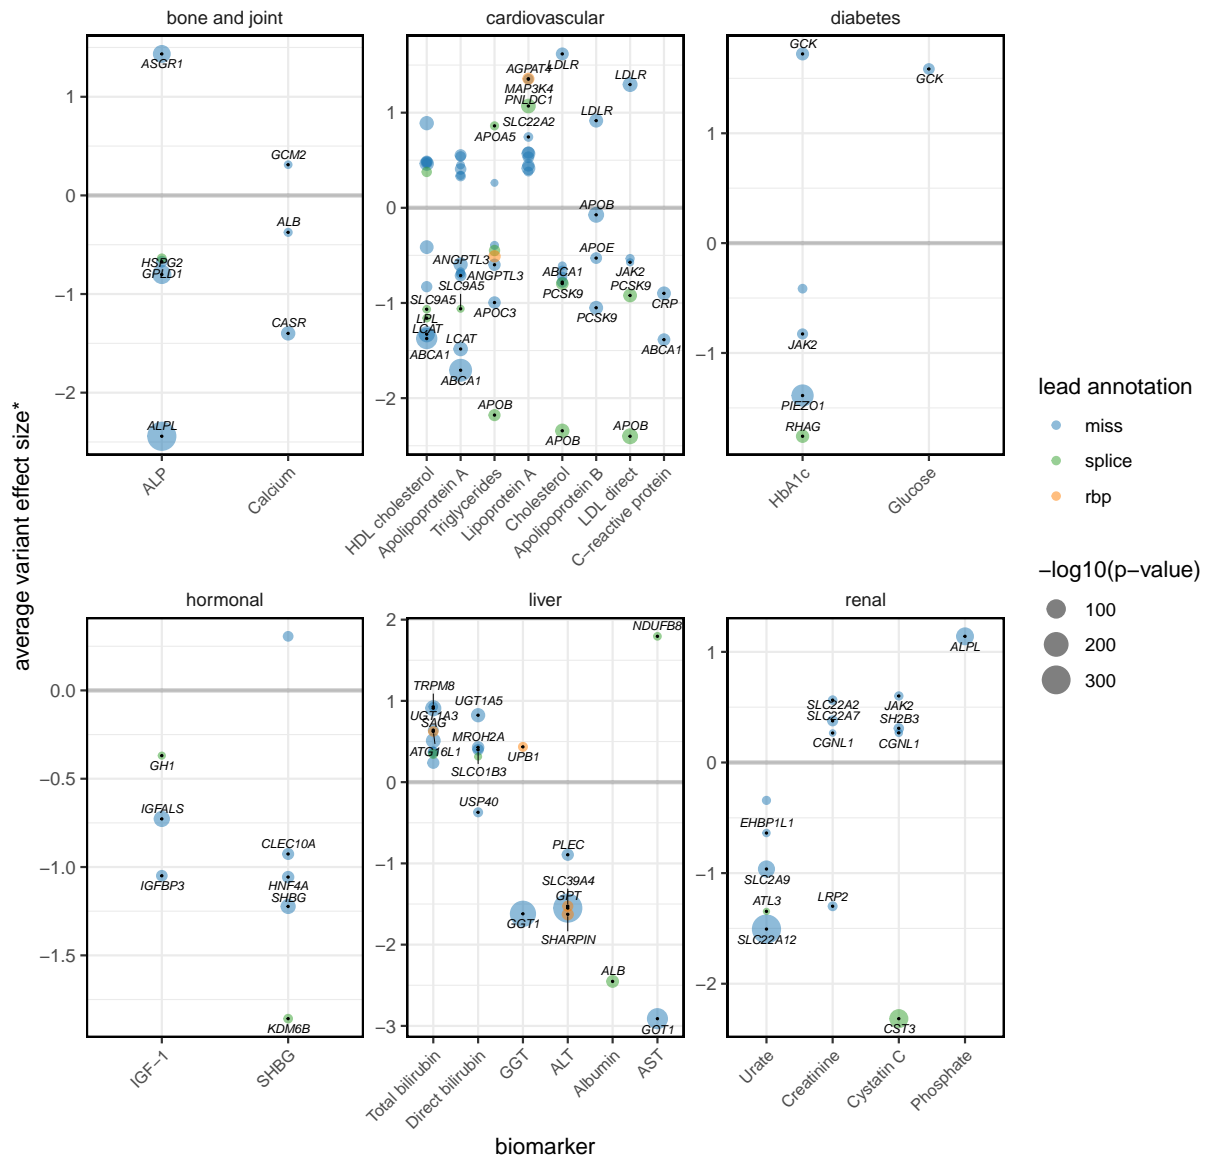

Supplementary Figure S3: **Kernel-based tests results overview.** We calculated the average effect size for \*variants with single-variant p-values below  $10^{-5}$  (score test) within significant genes found by kernel-based tests if the cumulative minor allele count across these variants was at least 5. Bubble plots showing these average effect sizes (y-axis) for each biomarker (x-axis). The four genes with largest average effect sizes are labeled for each biomarker. Larger bubble size indicates higher significance of the gene-based test. P-values and average effect sizes are those given by the most significant variant effect category (lead annotation). Effect sizes are calculated on covariate-corrected quantile transformed phenotypes. ALP: alkaline phosphatase; ALT: alanine aminotransferase; AST: Aspartate aminotransferase; GGT: Gamma glutamyltransferase.



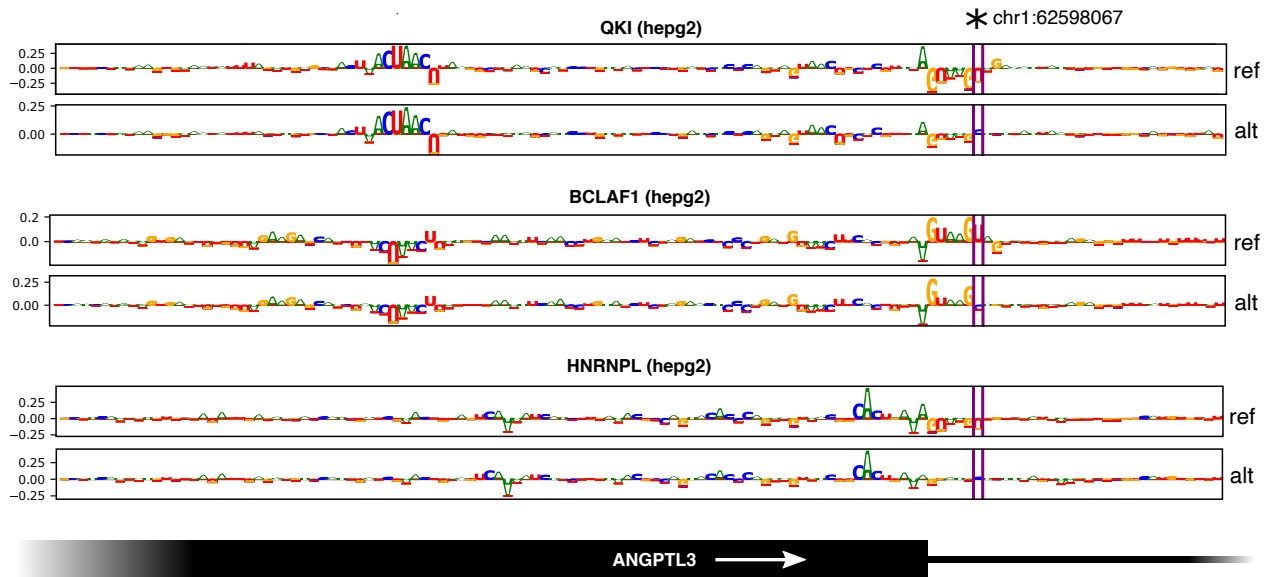

Supplementary Figure S4: **Attribution maps.** The variant 1:62598067:T:C at one-based position chr1:62598067 makes DeepRiPe predict increased binding probabilities for HNRNPL and QKI, and decreased probability for BCLAF1. Attribution maps for reference (ref) and alternative (alt) sequences as described in [23] highlight important nucleotides proximal to an ANGPTL3 exon boundary. The predictions for QKI depend positively on an upstream QKI binding motif (ACUAAC), and negatively on the splice donor signal (GUAAGU). The pattern is inverted for BCLAF1. Weakening of the splice signal by the alternative variant increases predicted binding probabilities for QKI and HNRNPL.

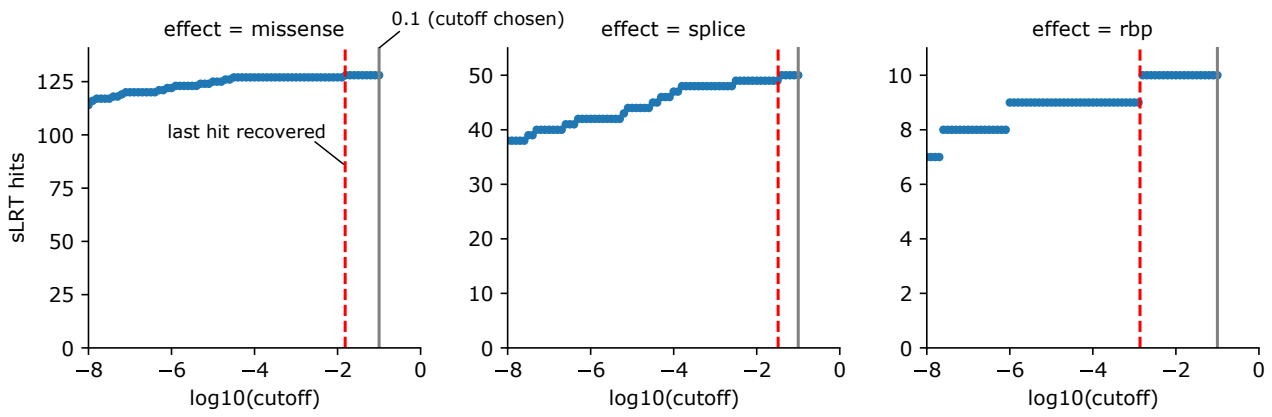

Supplementary Figure S5: **sLRT number of significant gene-biomarker associations vs score test cutoff for different variant effect categories.** Plots showing the number of significant associations found by the LRT depending on the nominal significance cutoff chosen for the score test (which determines whether the LRT is performed). We used the cutoff of 0.1 in our analysis. We found that a smaller nominal significance cutoff of 0.033 would still have recovered all genome-wide significant associations we reported, and a cutoff of 0.001 would have still recovered all but four (97.9%). Of those four associations, three would still have been found by association tests for other variant effect categories.

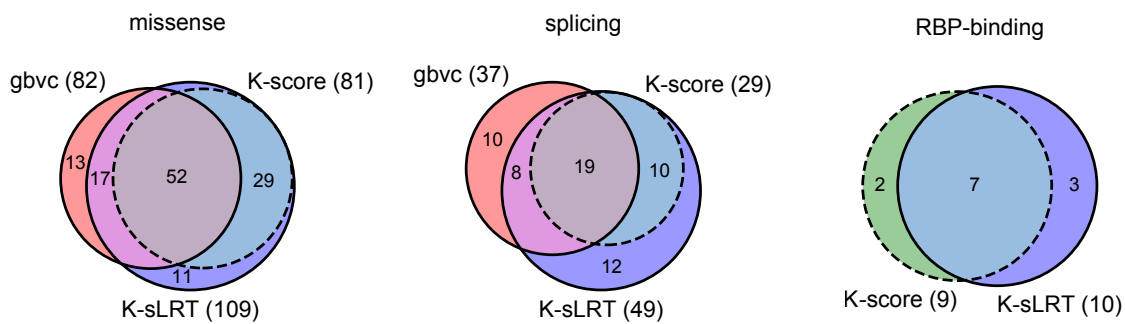

Supplementary Figure S6: **Kernel-based sLRT vs score test comparison.** Venn diagrams showing the significant locus-biomarker associations identified by the kernel-based score test (K-score), kernel-based sLRT (K-sLRT) and gene-based variant collapsing (gbvc, where performed, sLRT). For missense and splice variants, the hits identified by the kernel-based score test (dashed circle) were a subset of those identified by the kernel-based sLRT. The sLRT identified additional associations, of which a large fraction was also found by gbvc.

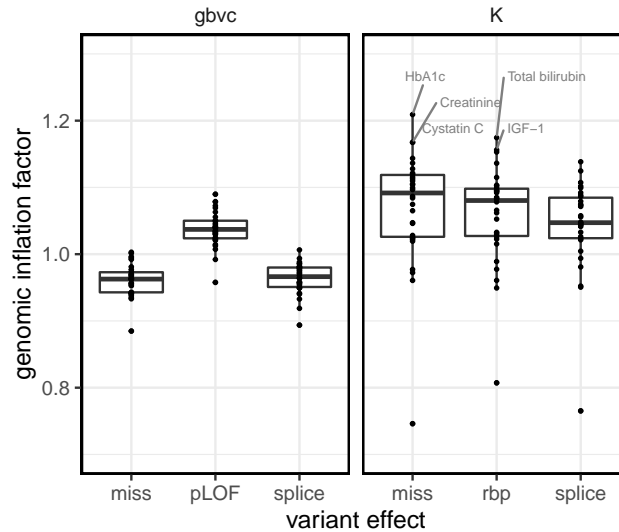

Supplementary Figure S7: **Genomic inflation factor across models.** We calculated  $\lambda$  for all tests that were performed exome-wide. Boxplots showing  $\lambda$  across all 30 phenotypes (y-axis) against the different variant categories and types of association tests. All values refer to the sLRT, except for gbvc-pLOF, where we only performed the score test. Left: gene based variant collapsing (gbvc); Right: kernel-based tests (K). QQ-plots for all models that resulted in at least one significant association are given in the Supplementary Data.

| variable type | variable name                     | biomarker category | UKB datafield | N      | GWAS catalog EFO | PhenoScanner EFO | comment                             |
|---------------|-----------------------------------|--------------------|---------------|--------|------------------|------------------|-------------------------------------|
| phenotype     | Alanine aminotransferase          | liver              | 30620         | 183037 | EFO_0004735      | EFO_0004735      | abbreviation: ALT                   |
| phenotype     | Albumin                           | liver              | 30600         | 168467 | EFO_0004535      | EFO_0004535      |                                     |
| phenotype     | Alkaline phosphatase              | bone and joint     | 30610         | 183105 | EFO_0004533      | EFO_0004533      | abbreviation: ALP                   |
| phenotype     | Apolipoprotein A                  | cardiovascular     | 30630         | 167375 | EFO_0004614      | EFO_0004614      |                                     |
| phenotype     | Apolipoprotein B                  | cardiovascular     | 30640         | 182168 | EFO_0004615      | -                | PhenoScanner queried by trait names |
| phenotype     | Aspartate aminotransferase        | liver              | 30650         | 182456 | EFO_0004736      | EFO_0004736      | abbreviation: AST                   |
| phenotype     | C-reactive protein                | cardiovascular     | 30710         | 182681 | EFO_0004458      | EFO_0004458      | abbreviation: CRP                   |
| phenotype     | Calcium                           | bone and joint     | 30680         | 168380 | EFO_0004538      | EFO_0004538      |                                     |
| phenotype     | Cholesterol                       | cardiovascular     | 30690         | 183098 | EFO_0004574      | EFO_0004574      |                                     |
| phenotype     | Creatinine                        | renal              | 30700         | 183001 | EFO_0004518      | EFO_0004518      |                                     |
| phenotype     | Cystatin C                        | renal              | 30720         | 183083 | EFO_0004617      | -                | PhenoScanner queried by trait names |
| phenotype     | Direct bilirubin                  | liver              | 30660         | 155280 | EFO_0004570      | EFO_0004570      |                                     |
| phenotype     | Gamma glutamyltransferase         | liver              | 30730         | 183018 | EFO_0004532      | EFO_0004532      | abbreviation: GGT                   |
| phenotype     | Glucose                           | diabetes           | 30740         | 188244 | EFO_0004468      | EFO_0004465      |                                     |
| phenotype     | Glycated haemoglobin (HbA1c)      | diabetes           | 30750         | 182851 | EFO_0004541      | EFO_0004541      |                                     |
| phenotype     | HDL cholesterol                   | cardiovascular     | 30760         | 168371 | EFO_0004612      | EFO_0004612      |                                     |
| phenotype     | IGF-1                             | hormonal           | 30770         | 182119 | EFO_0004627      | EFO_0004627      | Insulin-like Growth Factor 1        |
| phenotype     | LDL direct                        | cardiovascular     | 30780         | 182783 | EFO_0004611      | EFO_0004611      |                                     |
| phenotype     | Lipoprotein A                     | cardiovascular     | 30790         | 146534 | EFO_0006925      | EFO_0006925      |                                     |
| phenotype     | Oestradiol                        | hormonal           | 30800         | 30409  | -                | -                | no sign. associations               |
| phenotype     | Phosphate                         | renal              | 30810         | 168136 | -                | -                |                                     |
| phenotype     | Rheumatoid factor                 | bone and joint     | 30820         | 16022  | -                | -                | no sign. associations               |
| phenotype     | SHBG                              | hormonal           | 30830         | 166849 | EFO_0004696      | EFO_0004696      | Sex Hormone Binding Globulin        |
| phenotype     | Testosterone                      | hormonal           | 30850         | 165547 | EFO_0004908      | EFO_0004908      |                                     |
| phenotype     | Total bilirubin                   | liver              | 30840         | 182357 | EFO_0004570      | EFO_0004570      |                                     |
| phenotype     | Total protein                     | renal              | 30860         | 168259 | EFO_0004536      | EFO_0004536      |                                     |
| phenotype     | Triglycerides                     | cardiovascular     | 30870         | 182948 | EFO_0004530      | EFO_0004530      |                                     |
| phenotype     | Urate                             | renal              | 30880         | 182900 | EFO_0004531      | EFO_0004531      |                                     |
| phenotype     | Urea                              | renal              | 30670         | 182974 | -                | -                | no sign. associations               |
| phenotype     | Vitamin D                         | bone and joint     | 30890         | 174820 | EFO_0004631      | EFO_0004631      |                                     |
| covariate     | Age at recruitment                | -                  | 21022         | 192352 | -                | -                |                                     |
| covariate     | BMI                               | -                  | 21001         | 192352 | -                | -                | Body Mass Index                     |
| covariate     | Genetic principal components      | -                  | 22009         | 192352 | -                | -                | PC1 - PC10                          |
| covariate     | Sex                               | -                  | 31            | 192352 | -                | -                | female, male                        |
| covariate     | Smoking status                    | -                  | 20116         | 192352 | -                | -                | never, previous, current            |
| genotype      | Exome OQPE variants, PLINK format | -                  | 23155         | 192352 | -                | -                |                                     |

Supplementary Table S1: **UK Biobank data** Variables, UK Biobank datafields and samples sizes (N). EFO terms were used to match result with those reported in the NHGRI-EBI Catalog of human genome-wide association studies (GWAS catalog) and PhenoScanner.

## 624 5 Supplementary Methods

### 625 5.1 Variant weight calculation

626 All association tests we performed incorporated variant weights, which were derived from the variant effect  
627 predictions. All variant weights we used are numbers between 0 and 1. For protein LOF variants all weights  
628 were set to 1. For missense variants, we calculated the weights as follows:

$$w_i = \frac{(1 - s_{i,SIFT}) + s_{i,Polyphen}}{2} \quad (3)$$

629 where  $w_i$  is the weight for variant  $i$ .  $s_{i,SIFT}$  and  $s_{i,Polyphen}$  denote the SIFT and Polyphen scores for variant  
630  $i$ , respectively (potentially averaged across different transcript variants). This score can be interpreted as the  
631 average of the predicted probability of the variant being deleterious predicted by the two methods.

632 For splice variants, the weight  $w_i$  for a specific variant  $i$ , was set to the maximum of its four SpliceAI delta  
633 scores.

634 Regarding the predictions for the binding of RBPs, we proceeded as follows: While the experiments for the  
635 RBP QKI had been replicated in three cell lines, those for the other 5 RBPs had only been performed in a single  
636 cell line. As every replicate is a separate model output, this resulted in a total of 8 predictions for every genetic  
637 variant. We predicted the binding probability of each RBP to sequences centered on the major and minor  
638 alleles, while applying 4bp shifts around the center. We averaged four predictions across these small shifts to  
639 reduce variability. Finally, we calculated variant effect predictions  $v_{ij}$  for each variant  $i$  and RBP-replicate  $j$  by  
640 subtracting the prediction for the reference allele ( $p_{ij,ref}$ ) from the prediction for the alternative allele ( $p_{ij,alt}$ )  
641 [72]:

$$v_{ij} = p_{ij,alt} - p_{ij,ref} \quad (4)$$

642 These variant effect predictions are numbers between  $-1$  and  $1$ , where the sign denotes a gain of binding ( $+$ )  
643 or a loss of binding ( $-$ ). They were used to determine variant weights and variant similarities during association  
644 testing (see below), where we set the weight  $w_i$  of variant  $i$  to the largest absolute value of  $v_i$ .

### 645 5.2 Score- and likelihood ratio test implementation

646 As stated in the main text, let  $N(\boldsymbol{\mu}; \boldsymbol{\Sigma})$  denote a multivariate Normal distribution with means  $\boldsymbol{\mu}$  and a variance-  
647 covariance matrix  $\boldsymbol{\Sigma}$ . We wish to jointly test the association of  $m$  genetic variants with a quantitative trait  $\mathbf{y}$   
648 for a sample of  $N$  observations (i.e. participants), while controlling for  $q$  covariates. Within the linear mixed  
649 model framework,  $\mathbf{y}$  can be modelled as follows [8, 9]:

$$\mathbf{y} \sim N(\mathbf{X}\boldsymbol{\alpha}; \sigma_e^2 \mathbf{I}_N + \sigma_g^2 \mathbf{K}_g) \quad (5)$$

650 Where  $\mathbf{X}$  is the  $N \times q$  covariate design matrix (fixed effect) and  $\boldsymbol{\alpha}$  is the vector of fixed-effect parameters.

651 The variance-covariance matrix of  $\mathbf{y}$  is composed of the independently distributed residual variance ( $\mathbf{I}_N$  scaled  
652 by  $\sigma_e^2$ ) and the kernel-matrix  $\mathbf{K}_g$  (scaled by  $\sigma_g^2$ ), which captures the genetic similarity between individuals.  $\mathbf{K}_g$   
653 is a function of the  $N \times m$  matrix of mean-centered minor allele counts  $\mathbf{G}$  (random effect) of the genetic variants  
654 we wish to test.

655 In order to use efficient algorithms for estimating the parameters  $\sigma_e^2$  and  $\sigma_g^2$  and performing association tests,  
656 we require  $\mathbf{K}_g$  to be factored as a quadratic form [9, 11]:

$$\mathbf{K}_g = \phi(\mathbf{G})\phi(\mathbf{G})^T \quad (6)$$

657 Where the function  $\phi$  transforms  $\mathbf{G}$  into intermediate variables before performing the test.

658 The test statistic of the score test approximates the change of the log likelihood of a model when including  $\mathbf{K}_g$   
659 over the null model, which does not include  $\mathbf{K}_g$  ( $\sigma_g^2 = 0$ )[8]. We calculated test statistics using fast algorithms  
660 described in [11] and applied Davies’s method for the calculation of p-values [74] with accuracy of  $10^{-7}$  and  $10^6$   
661 iterations. Where Davies’s method returned p-values of 0, or in the rare cases where Davies method returned  
662 invalid (negative) p-values, we used saddle point approximation instead [75].

663 The test statistic of the likelihood ratio test is twice the difference of the log restricted likelihood of the  
664 alternative model and the null mode [9]. We used FaST-LMM’s LMM class [76] to fit the null and alternative  
665 models using restricted maximum likelihood and then calculated test statistics. To generate a null distribution  
666 we sampled 100 test statistics for every LR test, using our own port of RLRsim [77] in Python. Finally, we  
667 fit a parametric null distribution  $\pi\chi_0^2 + (1 - \pi)a\chi_d^2$  with free parameters  $\pi$ ,  $a$  and  $d$  to the pooled simulated  
668 test statistics using log-quantile regression on the 10% of largest test statistics, and used this distribution to  
669 calculate p-values as described in [9].

### 670 **5.3 Gene-based variant collapsing tests**

671 In gene-based variant collapsing, all qualifying variants overlapping a specific gene are collapsed into a single  
672 variable prior to association testing, i.e.  $\phi(\mathbf{G})$  in Equation 6 returns an  $N \times 1$ -vector. We modified the  
673 approach in [12] by incorporating variant effect predictions as weights. Within a specific gene, any participant  
674 could carry 0 or more qualifying variants, where each variant  $i$  has a weight  $w_i$  (derived from variant effect  
675 prediction, see above). Specifically, the collapsed score is the largest weight of any of the variants observed for  
676 a specific participant, or 0 if no qualifying variants were observed for that participant. This score makes three  
677 assumptions: additive effects are negligible (or unrealistic), variants with larger weights dominate over those  
678 with smaller weights and all variants affect the quantitative trait in the same direction.

### 679 **5.4 Functionally informed kernel-based tests**

680 The kernels we used in this analysis follow the general form:

$$\mathbf{K}_g = \mathbf{G}\mathbf{W}\mathbf{S}\mathbf{W}\mathbf{G}^T, \quad (7)$$

681 where  $\mathbf{W}$  is an  $m \times m$  diagonal matrix containing the square roots of variant weights on the diagonal and  
682 the  $m \times m$  matrix  $\mathbf{S}$  captures similarities between the genetic variants.  $\mathbf{G}$  is the  $n \times m$  matrix of mean-centered  
683 minor allele counts of the qualifying variants within the gene to be tested.  $\mathbf{S}$  can be interpreted as the variance-  
684 covariance matrix of regression coefficients of intermediate variables  $\mathbf{GW}$ . We use  $\mathbf{W}$  and  $\mathbf{S}$  to incorporate  
685 variant effect predictions (and other variant annotations) into the association tests.

686 While a shared regression coefficient ( $\mathbf{S} = \mathbf{1}_m \mathbf{1}_m^T$ ) might be a poor assumption in some cases, so can  
687 completely independent regression coefficients ( $\mathbf{S} = \mathbf{I}_m$ ). The former, when substituted into (7), has been  
688 referred to as the weighted counting burden test, whereas the latter is commonly called the weighted linear  
689 kernel [78]. In our analysis, we define  $\mathbf{S}$  based on available prior knowledge and type of variant effect prediction.

690 **Missense** For the analysis of missense variants, we introduce the locally collapsing kernel. Local collapsing  
691 aggregates groups of variants into single variables before performing the association test. “Local” refers to the  
692 fact that the groups are defined by the proximity of variants in the DNA-, RNA- or amino acid sequence. We  
693 grouped variants if they affect the same exact amino acid position of a specific gene. Once the groups are  
694 defined, local collapsing can be expressed as a matrix multiplication:  $\mathbf{S} = \mathbf{C}\mathbf{C}^T$  and the kernel (7) becomes:

$$K_g = \mathbf{G}\mathbf{W}\mathbf{C}\mathbf{C}^T\mathbf{W}\mathbf{G}^T \quad (8)$$

695 Here  $\mathbf{C}$  is the  $m$ -variants by  $g$ -groups collapsing matrix. Therefore  $\mathbf{G}\mathbf{W}\mathbf{C}$  is the  $n \times g$  weighted locally  
696 collapsed genotype matrix (where the columns now represent amino-acid positions instead of single genetic  
697 variants). The columns of  $\mathbf{C}$  define the group assignments and directionality of variant effects. For every  
698 variant  $i$  from 1 to  $m$  with (potentially signed) variant effect  $v_i$  and group  $j$  from 1 to  $g$ ,  $c_{ig} = \text{sgn } v_i$  if  
699 variant  $i$  belongs to group  $j$ , else  $c_{ig} = 0$ . In our case, variant effect predictions were unsigned (all positive).  
700 The assumptions of the locally collapsing kernel are that variants within groups share a common regression  
701 coefficient once they have been scaled by and aligned with the direction of their variant effect predictions.

702 **RBP-binding** Sometimes there are no clearly defined groups of variants or multiple (potentially directional)  
703 variant effect predictions need to be accounted for at once and therefore variants can’t easily be collapsed. Given  
704 what we know about the location of variants and their predicted effects, we might still make assumptions about  
705  $\mathbf{S}$ . As long as  $\mathbf{S}$  is positive definite, we can find a suitable square root  $\mathbf{L}$  so that  $\mathbf{L}\mathbf{L}^T = \mathbf{S}$  using the Cholesky  
706 decomposition. In the association tests involving directional predictions for the binding of RNA-binding proteins  
707 we calculated  $\mathbf{S}$  by forming the element-wise product of two  $m \times m$  matrices:

$$\mathbf{S} = \mathbf{L}\mathbf{L}^T = \mathbf{Q} \circ \mathbf{R} \quad (9)$$

708 Where  $\mathbf{Q}$  captures the similarity of variants based on their variant effect predictions and  $\mathbf{R}$  captures the  
709 similarity of variants based on their positions. Specifically, let  $\mathbf{v}_i$  be the vector of variant effect predictions  
710 for variant  $i$ . Then the element  $q_{ij}$  of  $\mathbf{Q}$  is the cosine similarity between  $\mathbf{v}_i$  and  $\mathbf{v}_j$ . We chose to model

711 the position-dependent similarity with a Gaussian kernel. If  $x_i$  is the chromosomal position of variant  $i$ ,  
712  $r_{i,j} = \exp(-\gamma(x_i - x_j)^2)$ , where we set  $\gamma = -\frac{\log(0.5)}{50^2}$ . At this value of  $\gamma$  two variants that are 50bp apart  
713 have a similarity of 0.5, which decays rapidly as the distance increases. As both  $\mathbf{Q}$  and  $\mathbf{R}$  are positive definite  
714 matrices, so is  $\mathbf{Q} \circ \mathbf{R}$ . This kernel makes the assumption that variants that are in close proximity and have  
715 aligned variant effect predictions should affect the phenotype in the same direction.

## 716 5.5 sLRT detailed description

717 **Missense** For missense variants, we iterated over all genes and performed score tests using gene-based variant  
718 collapsing and kernel-based tests (locally collapsing kernel), i.e. the diagonal elements  $w_{ii}$  of  $\mathbf{W}$  in Equation 7  
719 contained the square roots of the impact scores of variants. If either score test p-value was nominally significant  
720 ( $p < 0.1$ ) we also performed the following steps: 1. Calculation of likelihood ratio test statistics (sLRT), 2. gene-  
721 based variant collapsing combining both missense and loss of function variants in a joint test, 3. concatenation  
722 of the collapsed pLOF variable to the locally collapsed weighted matrix of missense variant minor allele counts  
723 ( $\mathbf{GWC}$ , Equation 8) and a joint kernel-based LRT.

724 We used the locally collapsing kernel in the kernel-based association tests for missense variants, as it had given  
725 more unique associations and overall slightly lower p-values for the most significant genes in initial experiments  
726 on the 50k WES release, and was more interpretable compared to other possible approaches.

727 **Splicing** For splice-variants we performed score tests using gene-based variant collapsing and the linear  
728 weighted kernel for all genes. Again, if either of the two score tests were nominally significant ( $p < 0.1$ ),  
729 we performed likelihood ratio tests (sLRT). As we did for missense variants, we then also performed combined  
730 association tests with protein loss of function variants using both gene-based variant collapsing and a kernel-  
731 based LRT. For the kernel-based test, we concatenated the protein LOF indicator variable to the matrix of  
732 weighted minor allele counts  $\mathbf{GW}$  (Equation 7, where  $\mathbf{S} = \mathbf{I}_m$ ). In the cases where a variant was annotated  
733 both as a splice-variant and pLOF variant, we treated it as a pLOF variant in the joint tests.

734 **RBP-binding** For variants predicted to alter the binding of RBPs we only performed kernel-based association  
735 tests using the kernel in Equation 7, where we used the largest absolute value of the variant effect predictions as  
736 the weights, and calculated  $\mathbf{S}$  as described above in Equation 9. We iterated over all genes and performed gene-  
737 based score tests. Because the DeepRiPe variant effect predictions are strand-specific, we did this independently  
738 for genes on the forward or reverse strands. If the score test for a specific gene was nominally significant  
739 ( $p < 0.1$ ), we performed the likelihood ratio test for that gene (sLRT). If the variants tested also included  
740 variants annotated as protein loss of function variants, we removed them and repeated the tests to avoid false  
741 positives.



## 742 **5.6 Cross-referencing against GWAS databases**

743 We queried the NHGRI-EBI GWAS Catalog [2] and PhenoScanner [24, 25] in order to see if single variants within  
744 the genes we found significantly associated with a specific biomarker had already been reported to be associated  
745 with that biomarker. For each gene, we submitted region queries using the gene boundaries with the gwasrapidd  
746 [28] and phenoscanner R-packages. For PhenoScanner, we set the p-value threshold to  $10^{-7}$ . Matching our  
747 results to those contained in these databases required us to define a mapping of UK Biobank biomarkers  
748 to the Experimental Factor Ontology (EFO) terms used in those databases. This mapping is provided in  
749 Supplementary Table S1. Additionally, as EFO terms for PhenoScanner were not always defined, we performed  
750 the following matching: "Apolipoprotein B" (UKB phenotype) to "APOB apolipoprotein B" (PhenoScanner  
751 trait) and "Cystatin C" to PhenoScanner traits "log eGFR cystatin C", "Serum cystatin c estimated glomerular  
752 filtration rate eGFR" and "Cystatin C in serum". The UK Biobank biomarker "Phosphate" was not defined in  
753 either database and could therefore not be queried.
